# Supplementary material
Source: PubMed Central journal article supplement (PMC5677551)

### Supplemental Figure 1. Relates to Figure 2.

**A)** Pigment glial (*54C-GAL4*) or neuronal (*Elav-GAL4*) knockdown of *Sln* (**b, f**), *out* (**c, g**) and *Bsg* (**d, h**) does not affect cellular integrity or alter LD accumulation in 1-day-old animals. **B) a-b.** Whole eye clones of *sicily<sup>E</sup>* and *Marf<sup>B</sup>* created with *GMRhid FRT19A; Eyeless-GAL4, UAS-Flp* show high levels of glial LD when stained with Nile Red. **c-f.** Glial LD accumulation is reduced with whole eye (*Eyeless-GAL4*) knockdown of *Sln* and *out* using RNAi. **C)** Quantification of B. **D) a-b.** Nile Red stained whole-mount retina show LD accumulation in the *sicily<sup>E</sup>* and *Marf<sup>B</sup>* mutant clones. **c-f.** One copy loss of *Sln<sup>D1</sup>* or *Bsg<sup>1217</sup>* in the mutant background reduces LD accumulation. **E) a-b.** *sicily<sup>E</sup>* and *Marf<sup>B</sup>* mutant clones exhibit photoreceptor degeneration after 5 days as stained by phalloidin (F-actin) which is ameliorated with whole eye (*Eyeless-GAL4*) knockdown of *Sln* or *out* (**c-f**) or one copy loss of *Sln<sup>D1</sup>* or *Bsg<sup>1217</sup>* (**g-j**). All data points represent mean +/- SEM Student's t-tests were used to calculate significance (\* $P < 0.05$ , \*\* $P < 0.005$ , \*\*\* $P < 0.0005$ ,  $n = 10$  animals each)

### Supplemental Figure 2. Relates to Figure 3.

**A)** Primary murine olfactory bulb co-cultured cells show astrocytes, neurons and olfactory bulb ensheathing glia. **B) a-b,** OB co-culture (C57BL/6J) treated with 2 $\mu$ M rotenone did not accumulate significant glial LD accumulation with the addition of 1.5mM AD4. c-d. Blocking MCTs using 50  $\mu$ M MCTi2 (SP13800) lead to less LD accumulation. **e-f.** 2 $\mu$ M rotenone combined with 200nM MCTi and 1.5mM AD4 did not lead to high levels of glial LD accumulation. **C)** Single culture of olfactory bulb neurons or astrocytes do not accumulate LD in response to elevated ROS. **D)** Quantification of the percentage of total neuron/glia with LD accumulation. **E)** TUNEL staining measures cell death. 24 hrs treatment with 2  $\mu$ M rotenone increased cell death to ~20%. Inhibiting lactate transport immediately or 12 hrs after rotenone using MCTi reduced cell death to a level comparable to vehicle control ( $n > 200$  cells). **F)** Addition of 11mM lactate to co-cultured cells at 5DIV did not alter number of cleaved caspase 3 positive cells at 11 DIV ( $n > 200$  cells). **G)** Wire hang assay. Mice treated with 3mg/kg/day rotenone for 8 days exhibit motor deficits (Student's t-test.  $n = 5$  per treatment.) All data points represent mean +/- SEM. Student's t-tests were used to calculate significance, (\* $P < 0.05$ , \*\* $P < 0.005$ , \*\*\* $P < 0.0005$ ). Scale bar: 50  $\mu$ m.

### Supplemental Figure 3. Relates to Figure 4.

**A)** Nile Red staining of 1-day-old whole mount retina shows neuronal (*Elav-GAL4*) or glial (*54C-GAL4*) knockdown of *Ldh* or *Pdha* does not affect cellular integrity or LD accumulation at day 1. **B)** Glial knockdown of *Ldh* (**a**) ameliorated LD accumulation while knockdown of *Pdha* (**b**) in the *Rh-ND42 IR* background did not. Neuronal knockdown of *Pdha* (**e**) or *Ldh* (**f**) lead to a reduction of glial LD accumulation in the *Rh-ND42 IR* background. **C)** Removing 1 copy of *Pdha* or citrate synthase (*Kdn*) reduces LD accumulation in *Rh-ND42 IR* (**a-c**), *Rh-Marf IR* (**d-f**) and *Rh-Aats-met IR* (**g-i**) retinas. **D)** *N-Syb-GAL4* overexpression of *UAS-SREBP* and *UAS-JNK* leads to glial LD accumulation (**a, b**). Neuronal knockdown of MCTs (*Slc* [**c, d**] and *out* [**e, f**]) and metabolic enzymes (*Ldh* [**g, h**] and *Pdha* [**i, j**]) ameliorates glial LD accumulation. Data are represented as mean  $\pm$  SEM. Student's t-tests were used to calculate significance (\* $P < 0.05$ , \*\* $P < 0.005$ , \*\*\* $P < 0.0005$ . n = 10).

### Supplemental Figure 4. Relates to Figure 5

**A)** Nile Red stain of whole-mount retina reveal that Neuronal (*Elav-GAL4*) or glial (*54C-GAL4*) knockdown of *Fatp* does not affect cellular integrity at day 1. **B)** Neuronal or glial knockdown of *Fatp* in the *Rh-ND42 IR* background reveal a reduced number of LD accumulated in glial cells **C)** *Eyeless-GAL4* knockdown of *Fatp* (**b, d**) in the *sicily<sup>F</sup>* and *Marf<sup>B</sup>* mutant clones reduces glial LD accumulation. **D)** Quantification of C. **E)** Immunohistological staining for FATP1 and FATP4 in wildtype (BL6) cells. (blue: DAPI, red: Tuj1, gray: GFAP). **F) a-d.** Cells transduced with non-targeting sgRNA have intact FATP4 protein localization can to accumulate glial LD after being treated with 2 $\mu$ M rotenone. **e-h.** sgRNA knockout of FATP4 leads to a disruption of protein localization and cells were unable to accumulate LD after 2 $\mu$ M rotenone treatment. Data are represented as mean  $\pm$  SEM. Student's t-tests were used to calculate significance (\* $P < 0.05$ , \*\* $P < 0.005$ , \*\*\* $P < 0.0005$ . n = 10). Scale bar: 50  $\mu$ m.

### Supplemental Figure 5. Relates to Figure 6

**A)** Neuronal (*Elav-GAL4*) or glial (*54C-GAL4*) knockdown of *Glaz* or *Nlaz* does not affect cellular integrity at day 1. **B)** One-copy-loss of *Glaz* or *Nlaz* in the *sicily* mutant background delays photoreceptor degeneration. **C) a.** Control flies have dark red eyes. **b.** *54C-GAL4* (pigment cell driver) knockdown of *white* leads to yellow colored eyes. **c.** *Glaz<sup>T2A-GAL4</sup>* (glial apolipoprotein driver) knockdown of *white* results in a subtle loss of red pigment. **D)** *Glaz<sup>T2A-GAL4</sup>* expressing *UAS-mCD8GFP* represents one copy loss of *Glaz* with expression of *UAS-mCD8::GFP*.

*Glaz*<sup>T2A-GAL4</sup> expression of *Glaz* and the *APOE* alleles does not lead to glial LD accumulation. **E)** *Daughterless-GAL4* ubiquitous overexpression of *UAS-APOE* alleles reveal similar levels of protein expression in third instar larvae. Actin used as loading control. Data are represented as mean  $\pm$  SEM. Student's t-tests were used to calculate significance ( $*P < 0.05$ ,  $**P < 0.005$ ,  $***P < 0.0005$ . n = 10).

### **Supplemental Figure 6. Relates to Figure 7**

**A)** Nile Red stained whole mount retina of neuronal and glial overexpression of *UAS-mCD8::GFP* shows no LD accumulation. Neuronal and glial overexpression of *Glaz*, *APOE2* and *APO3* variants leads to more glial LD accumulation compared to overexpression of *APOE4* variant. **B)** F-actin (phalloidin) staining of photoreceptors from 1-day-old adult flies. All flies were raised on 25  $\mu$ M rotenone and *APOE4* expressing flies exhibit “comet” tails on a subset of rhabdomeres. Dotted outlines point out the comet structures. **C)** Flies raised on 25  $\mu$ M rotenone were aged for 10 days. F actin staining reveal photoreceptor loss. Dotted outline denotes missing rhabdomeres.

# Figure S1

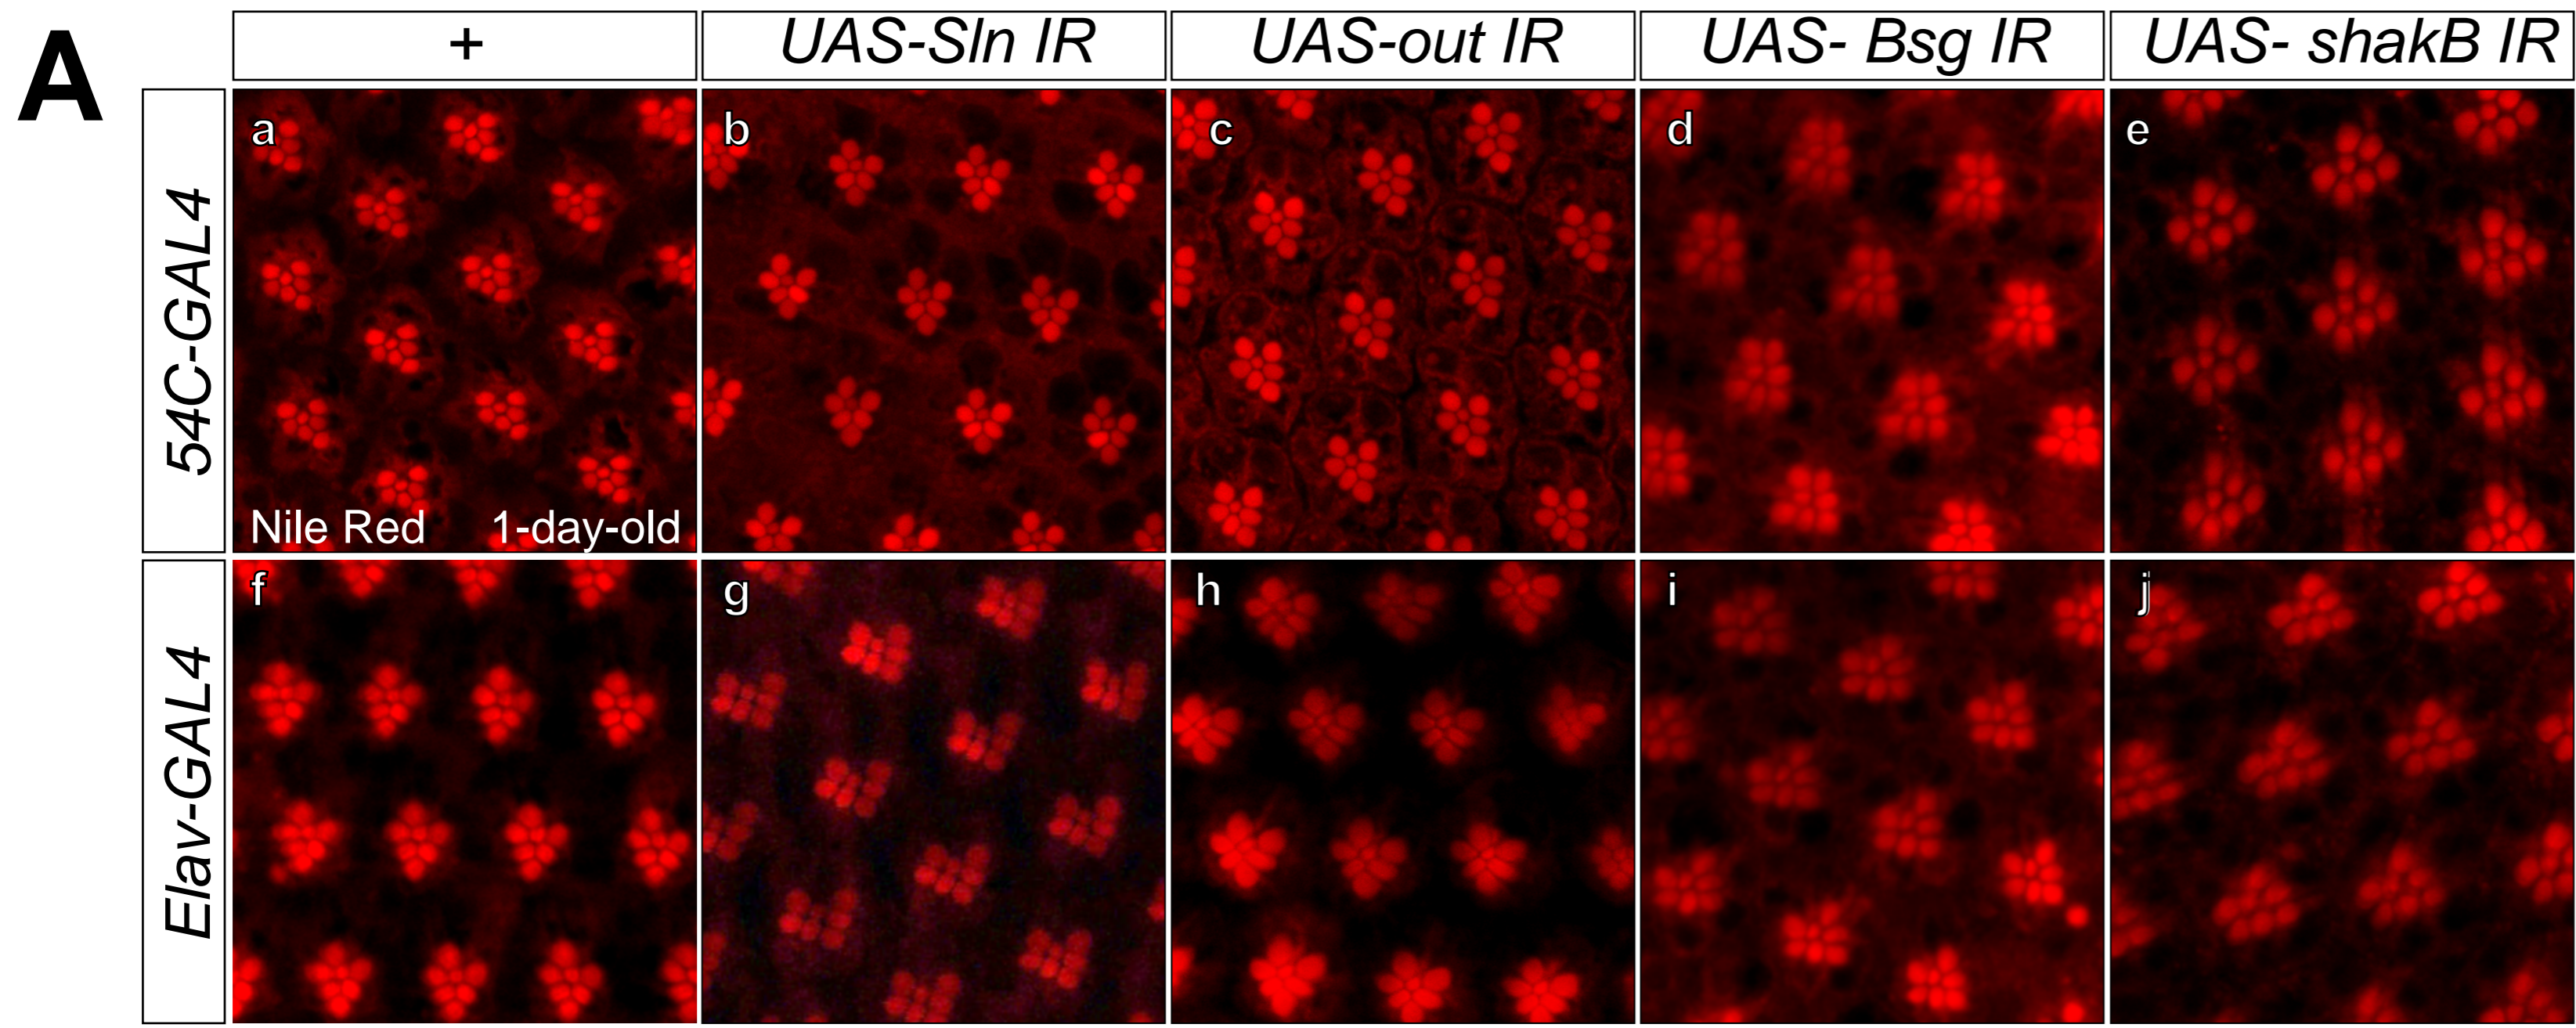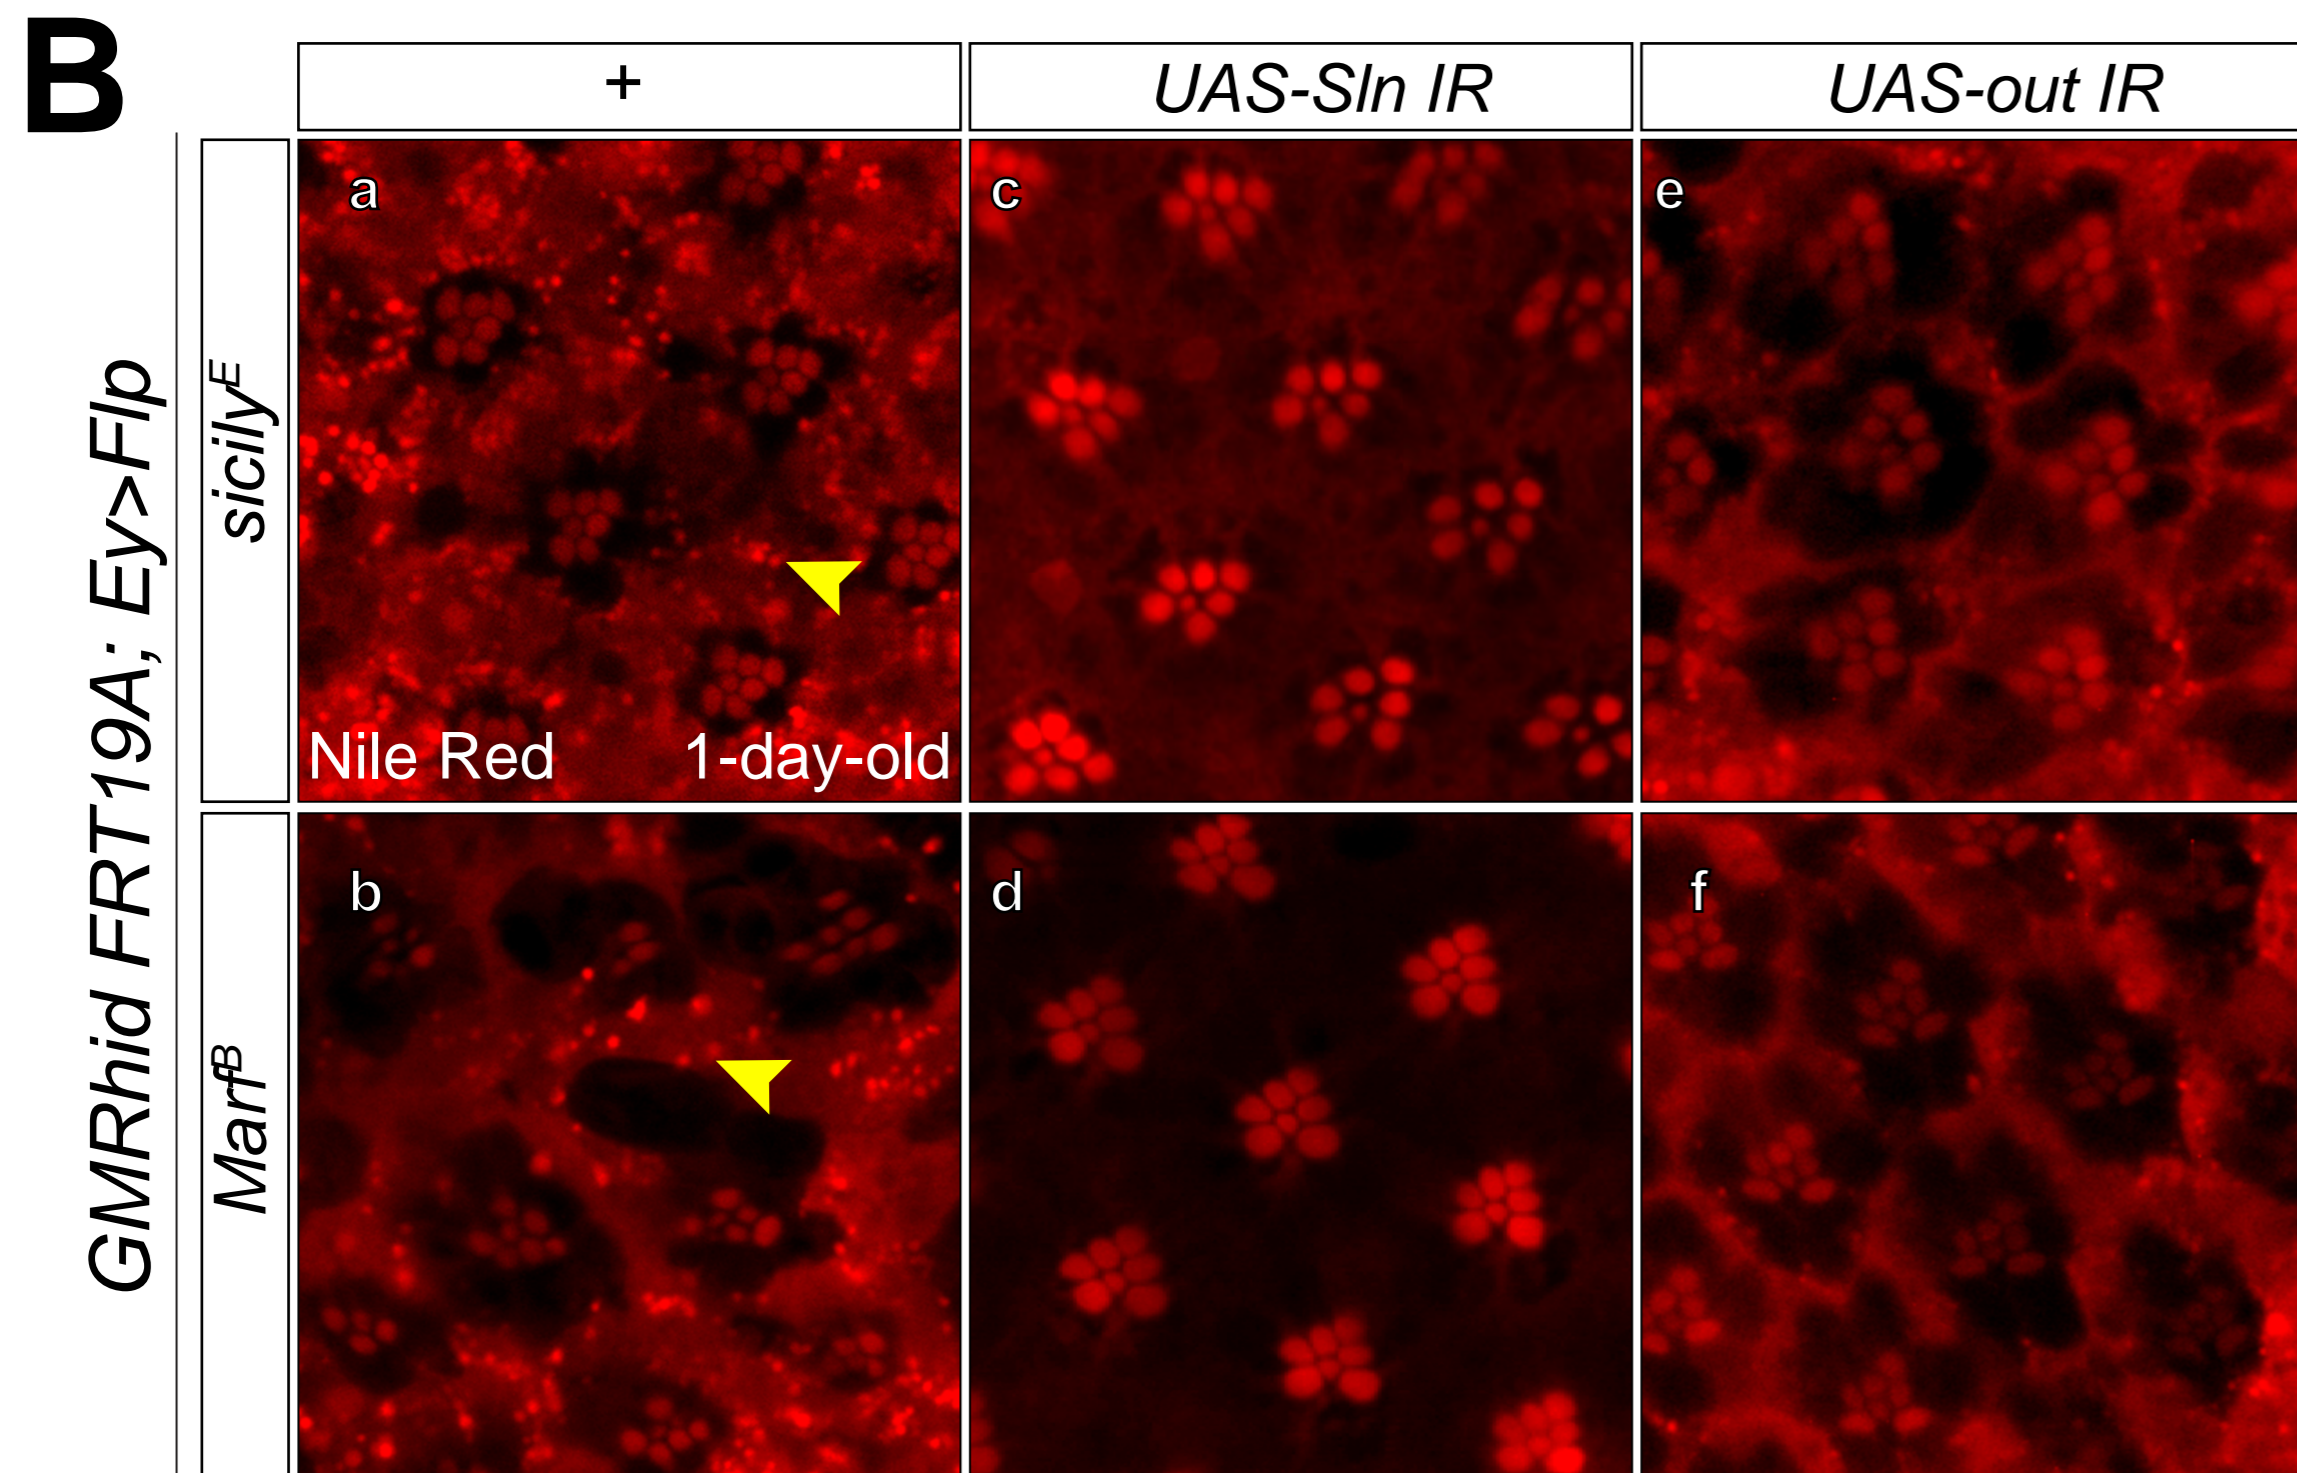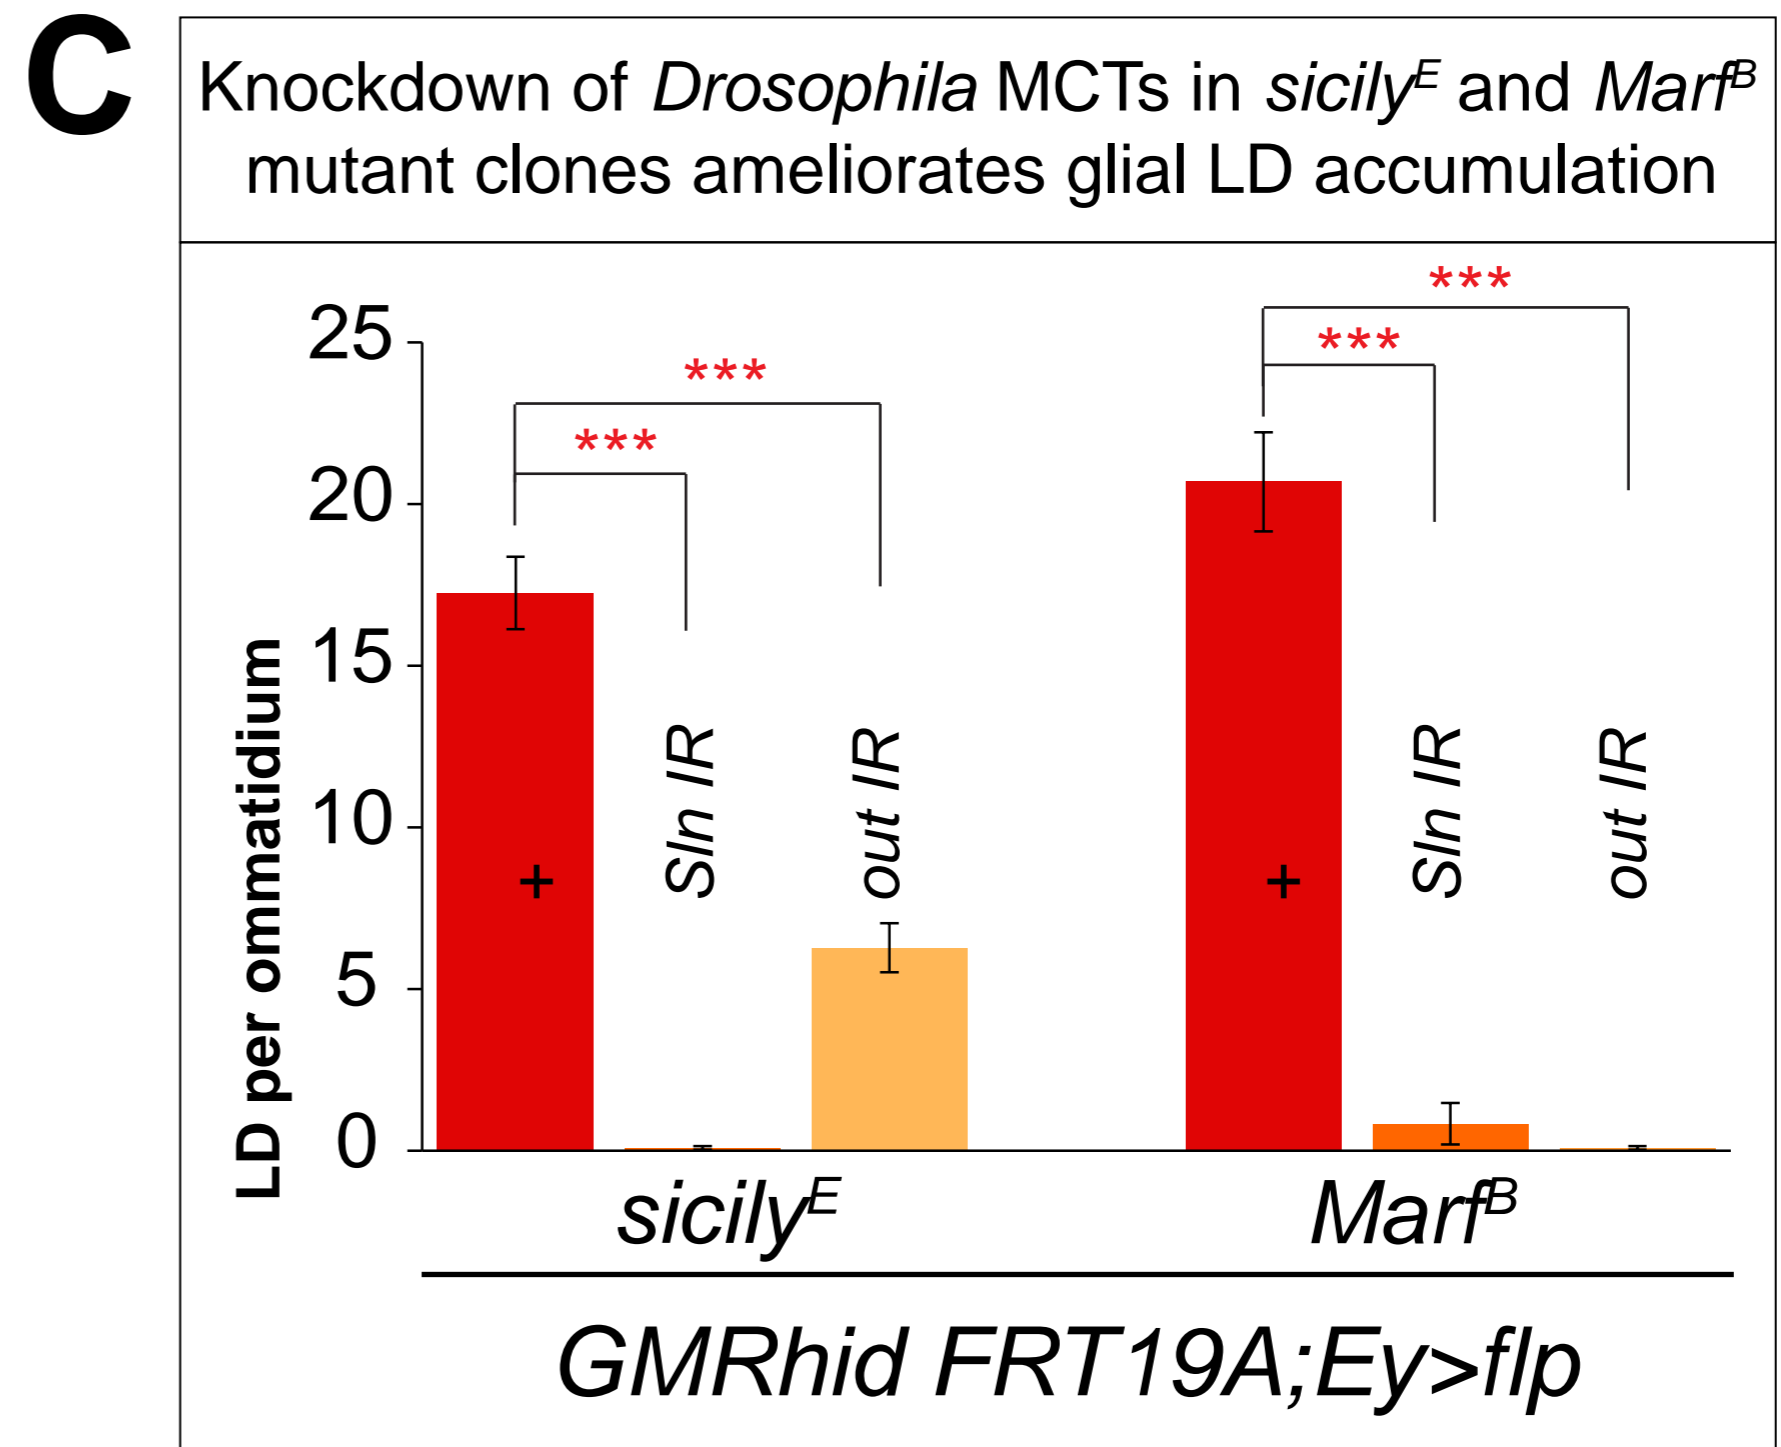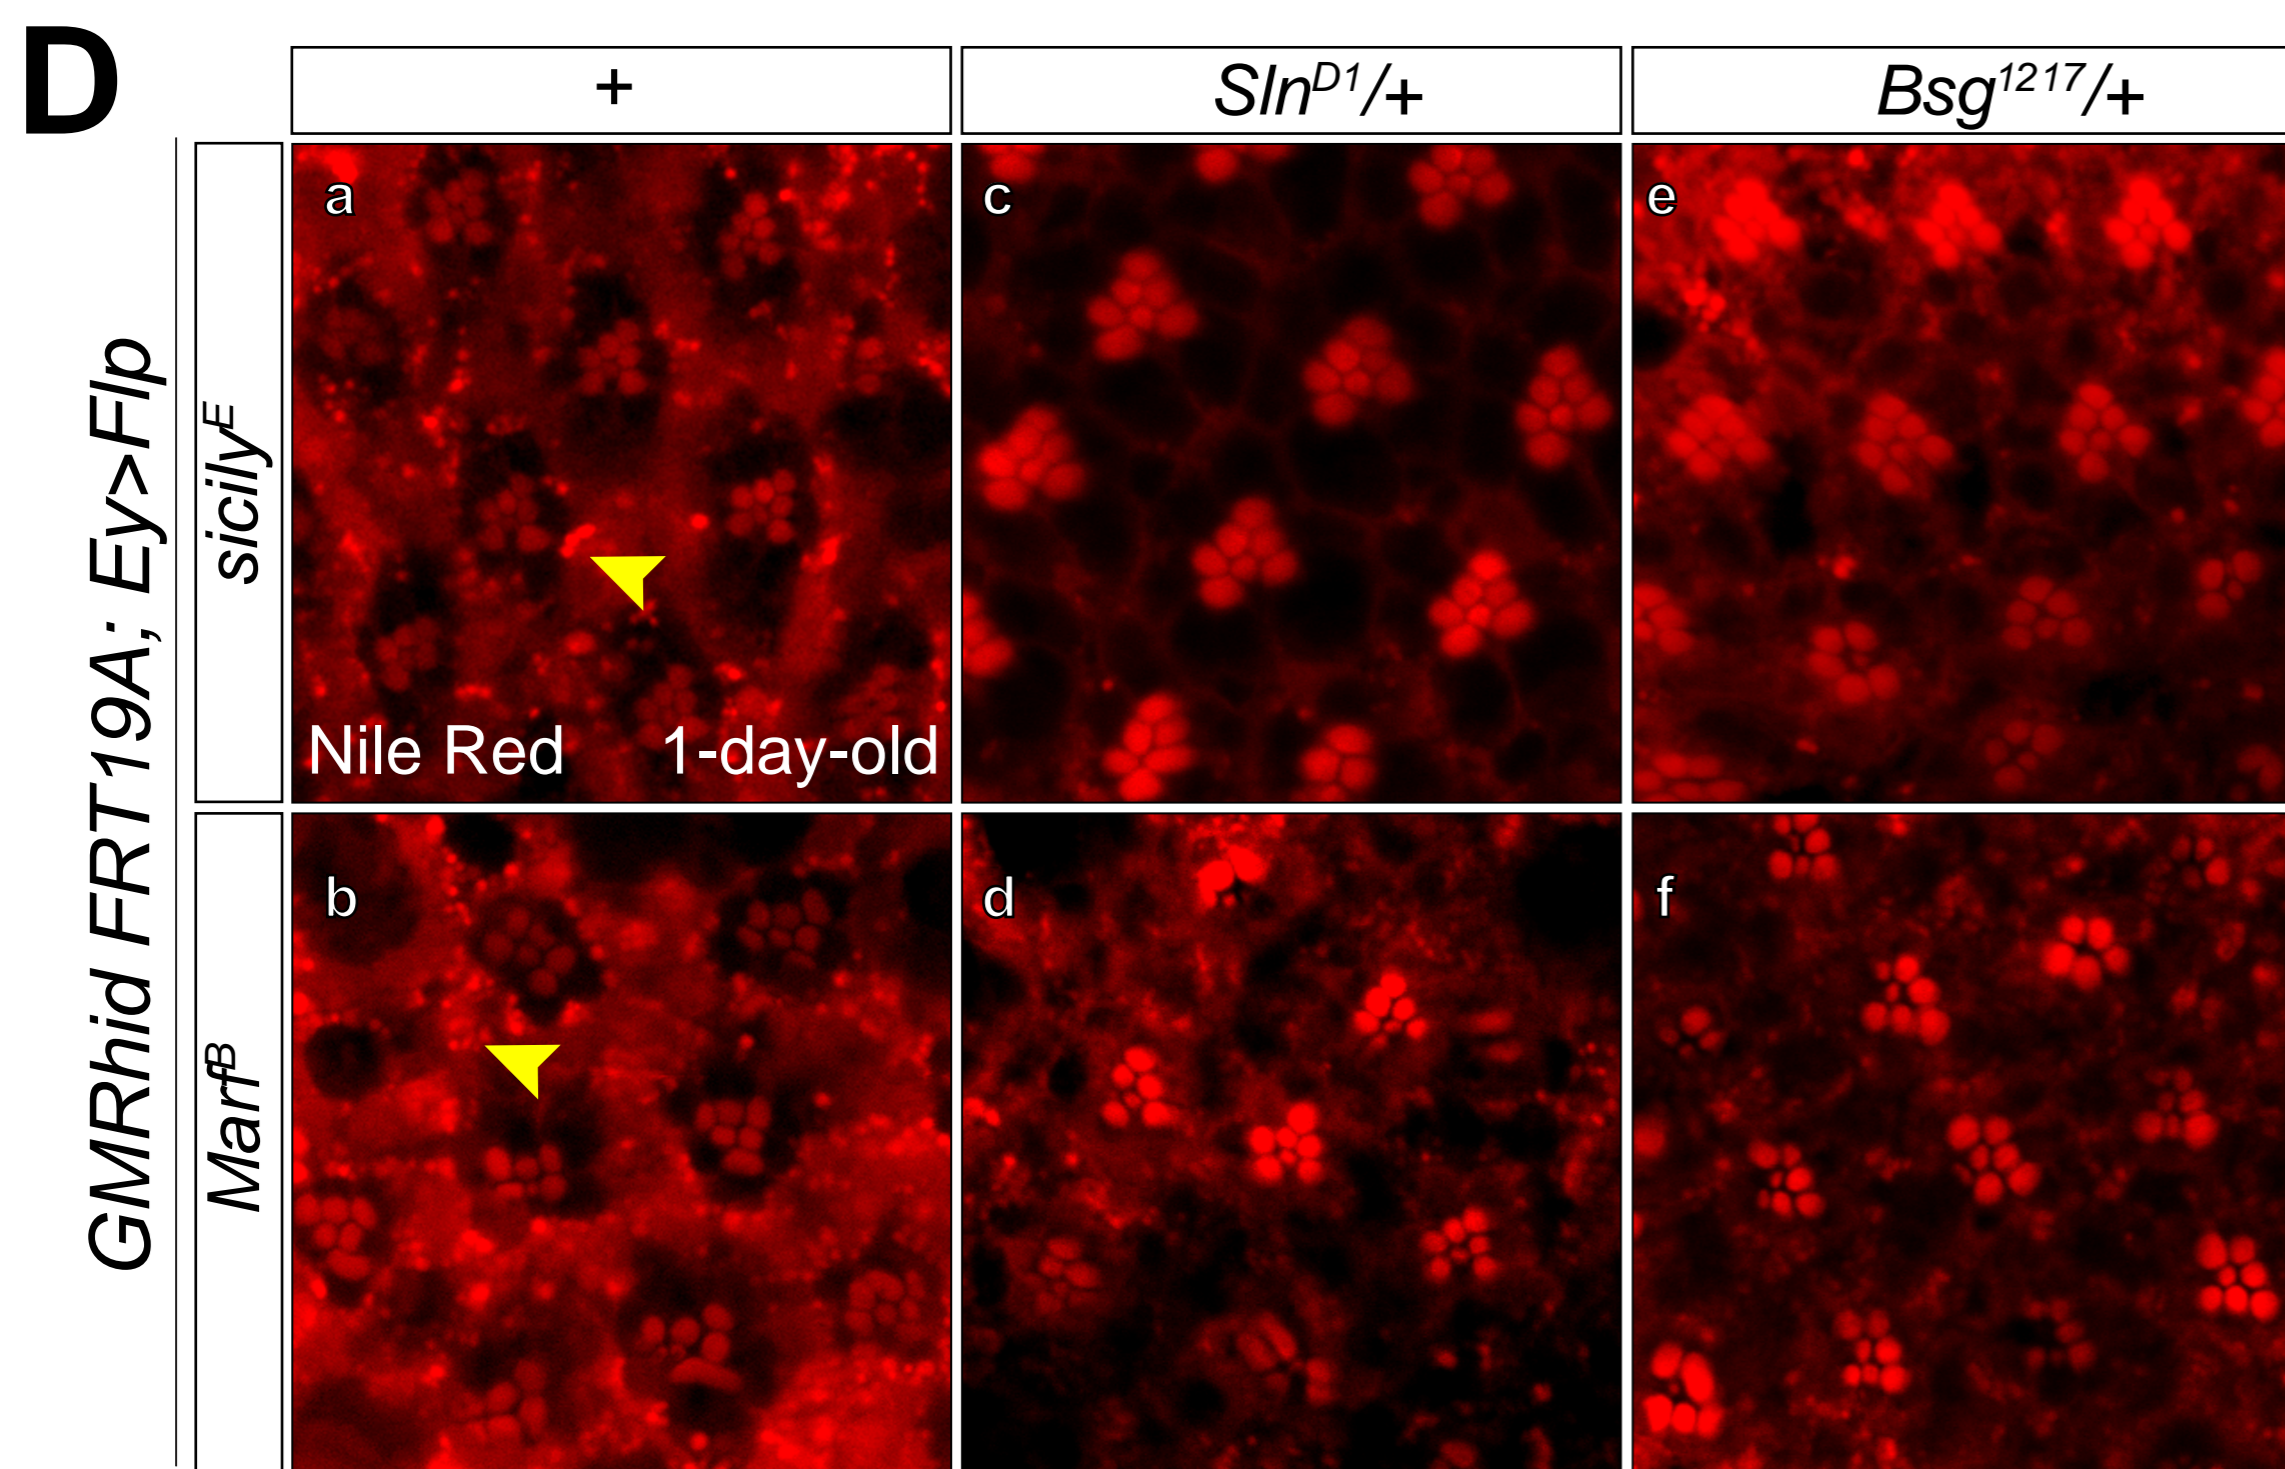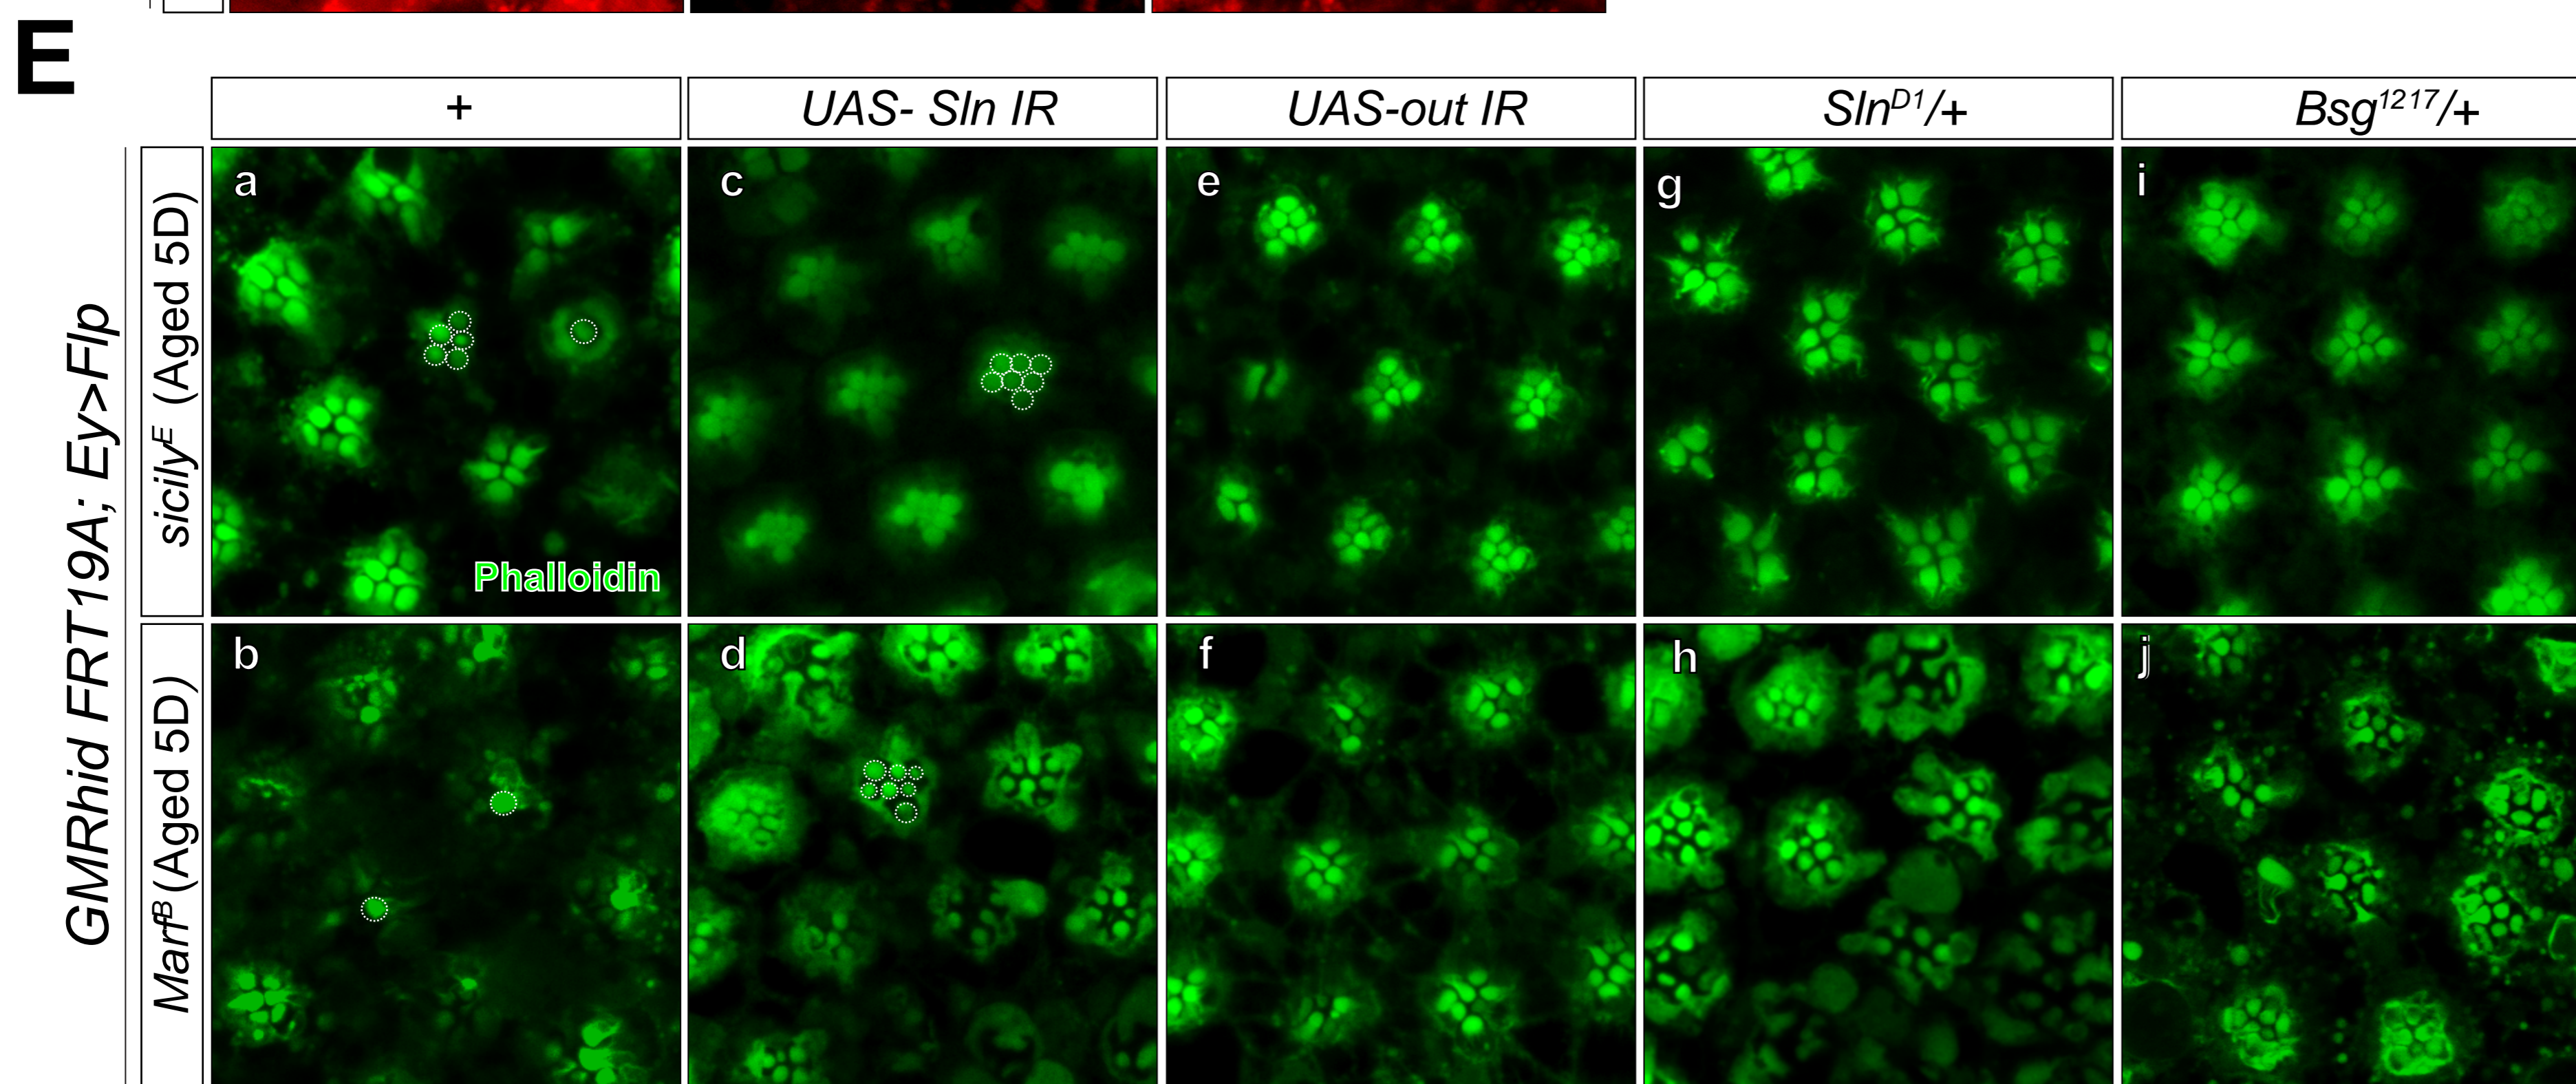

Figure S2.

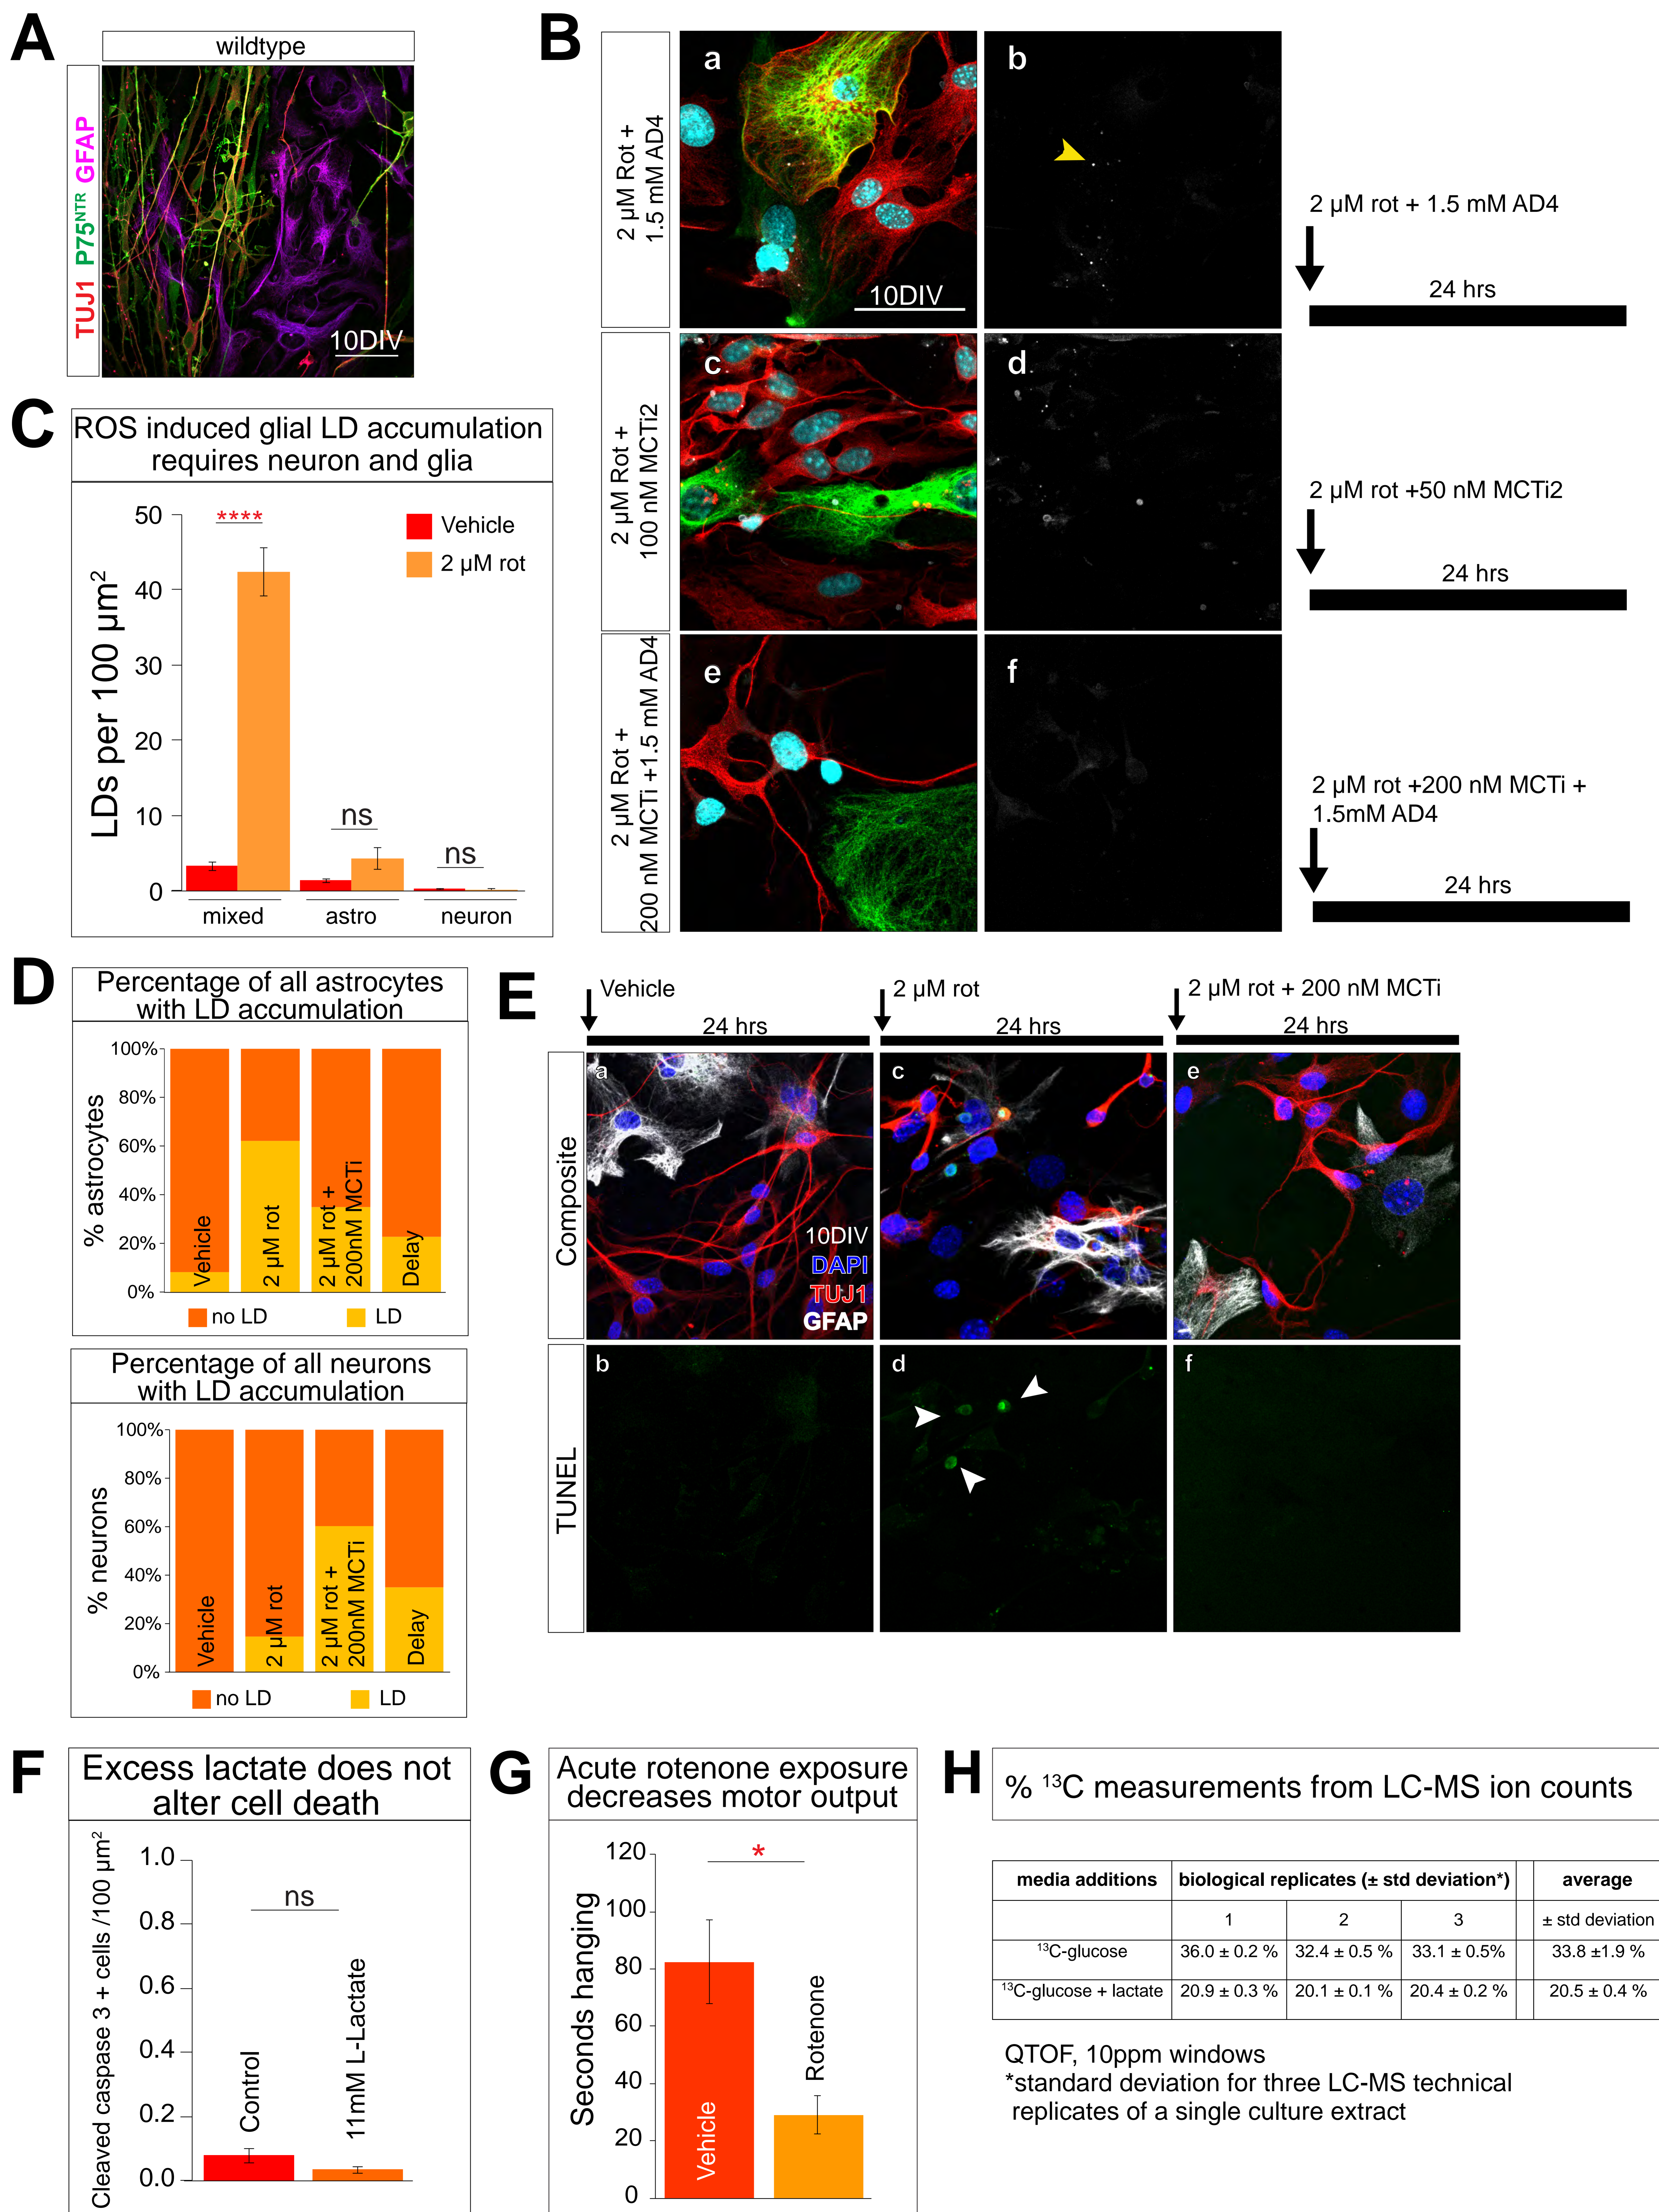

Figure S3.

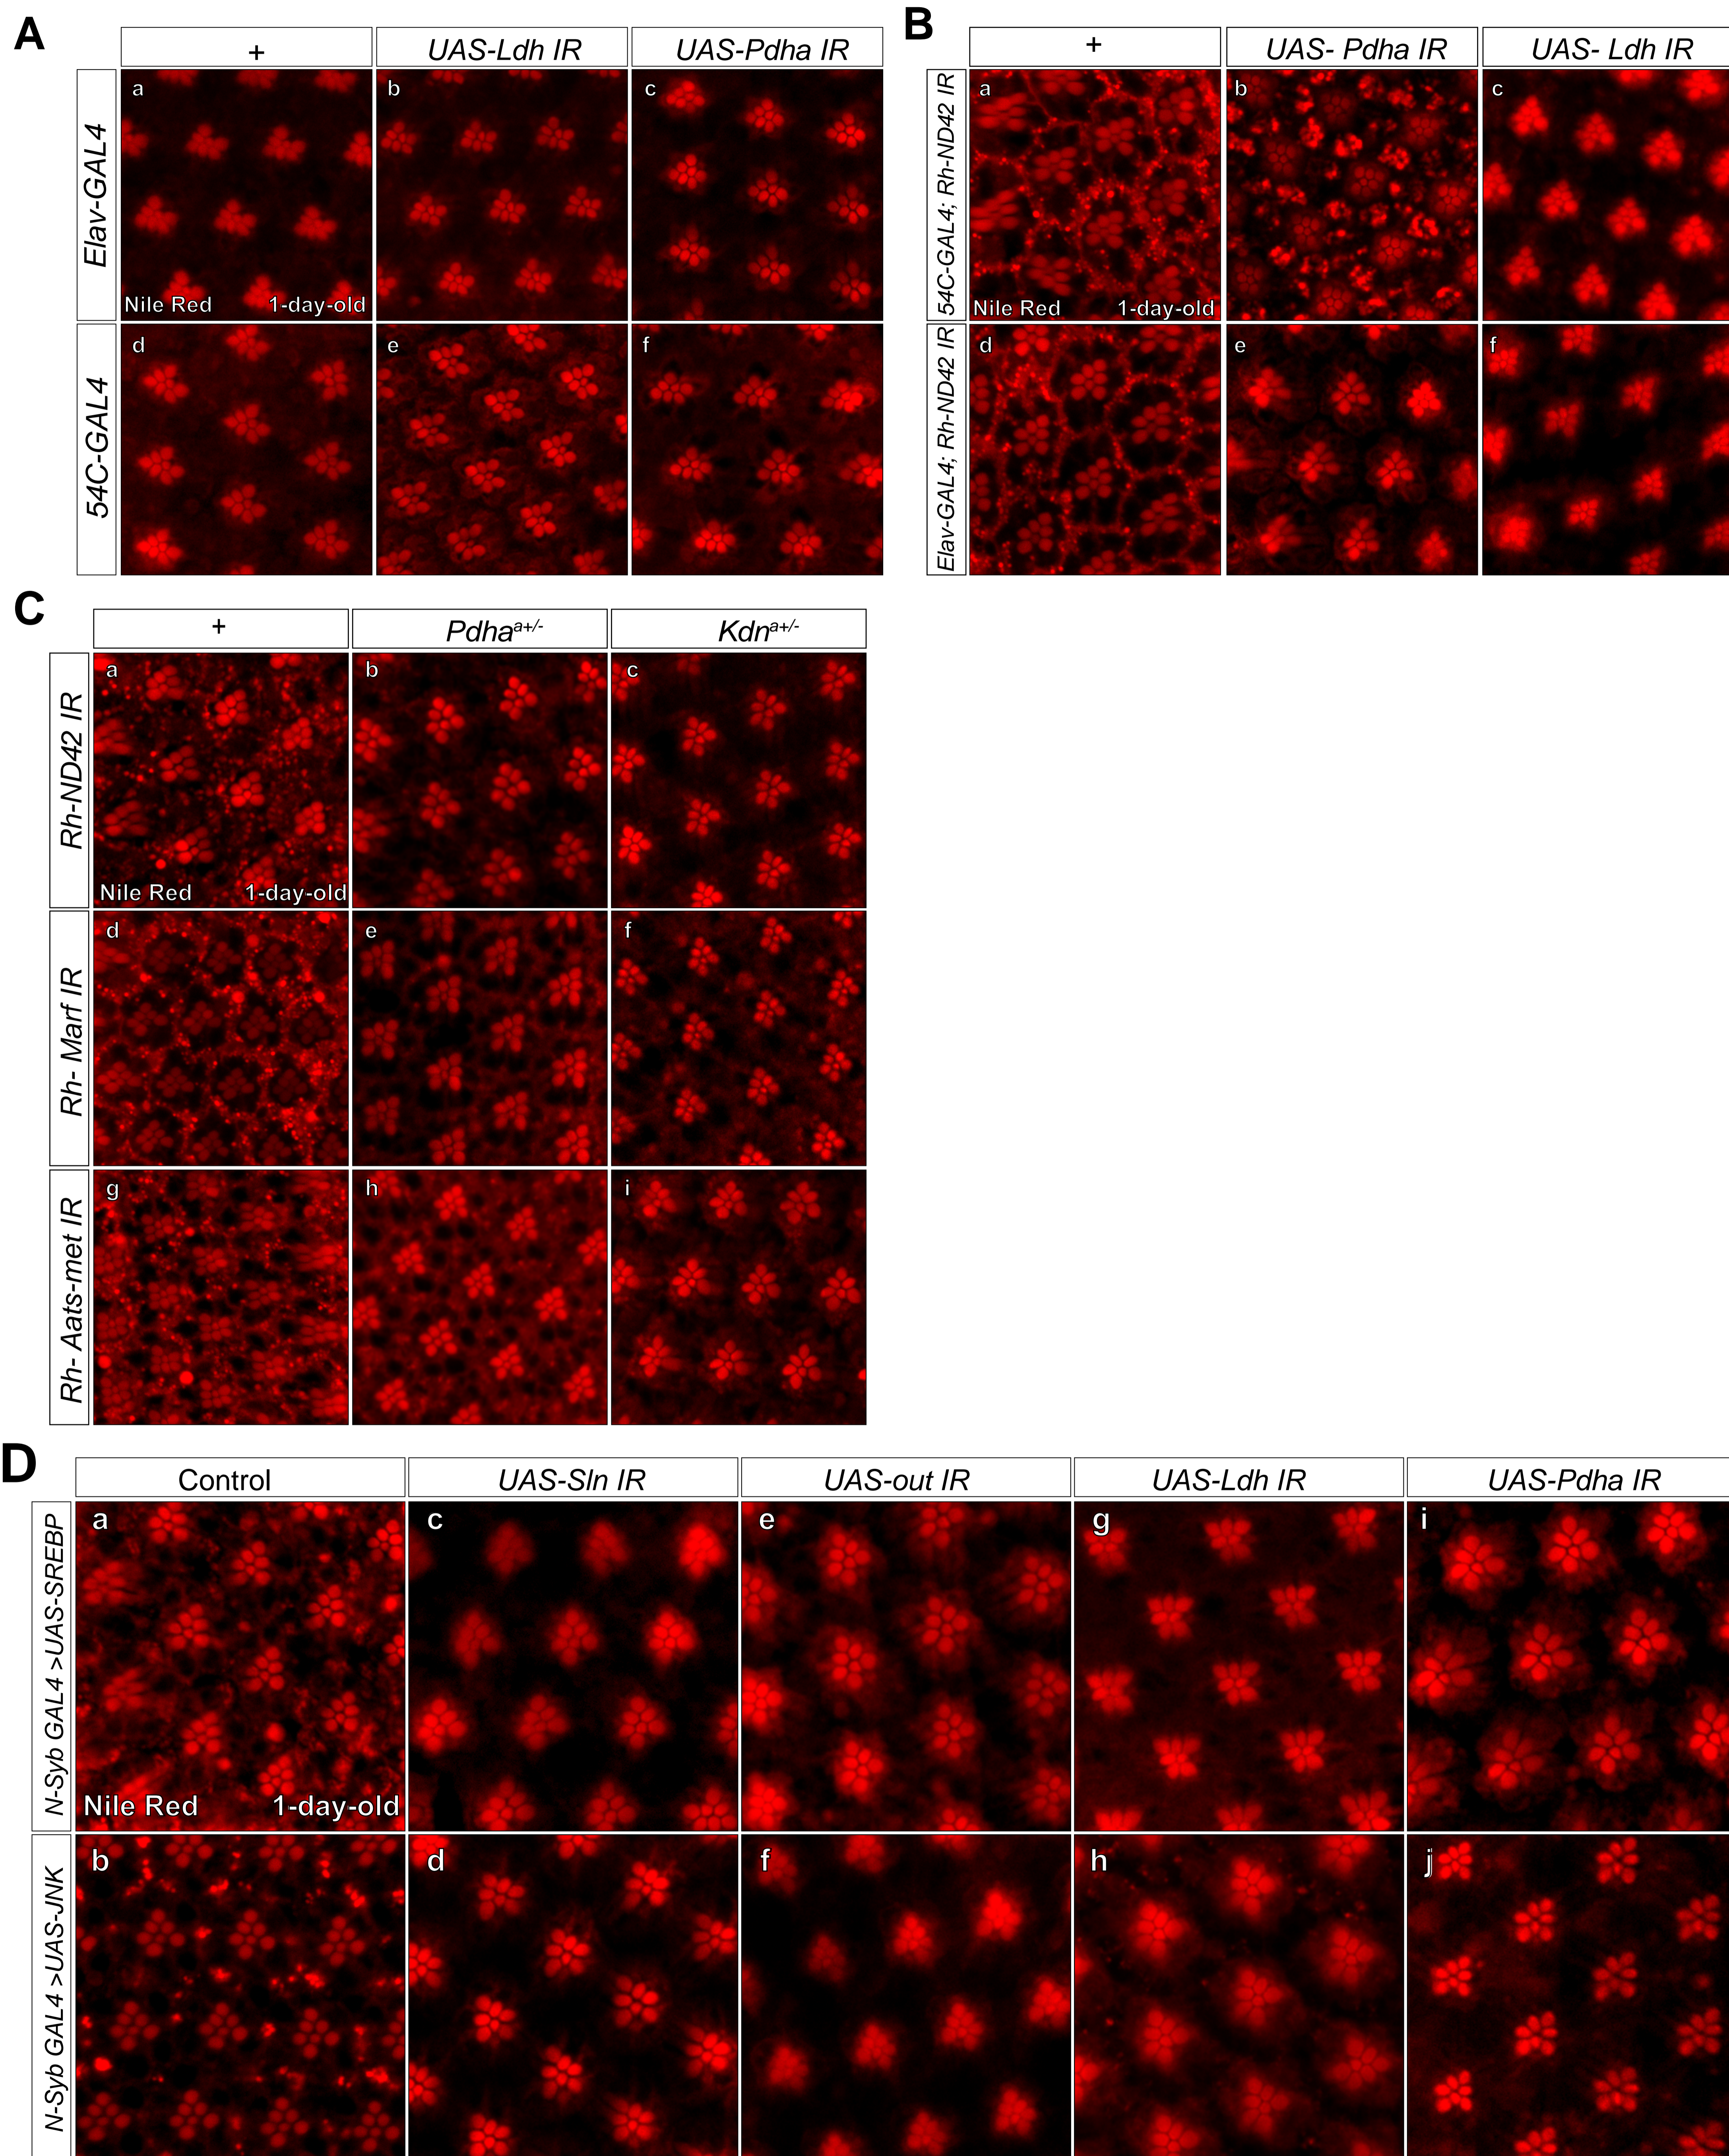

Figure S4.

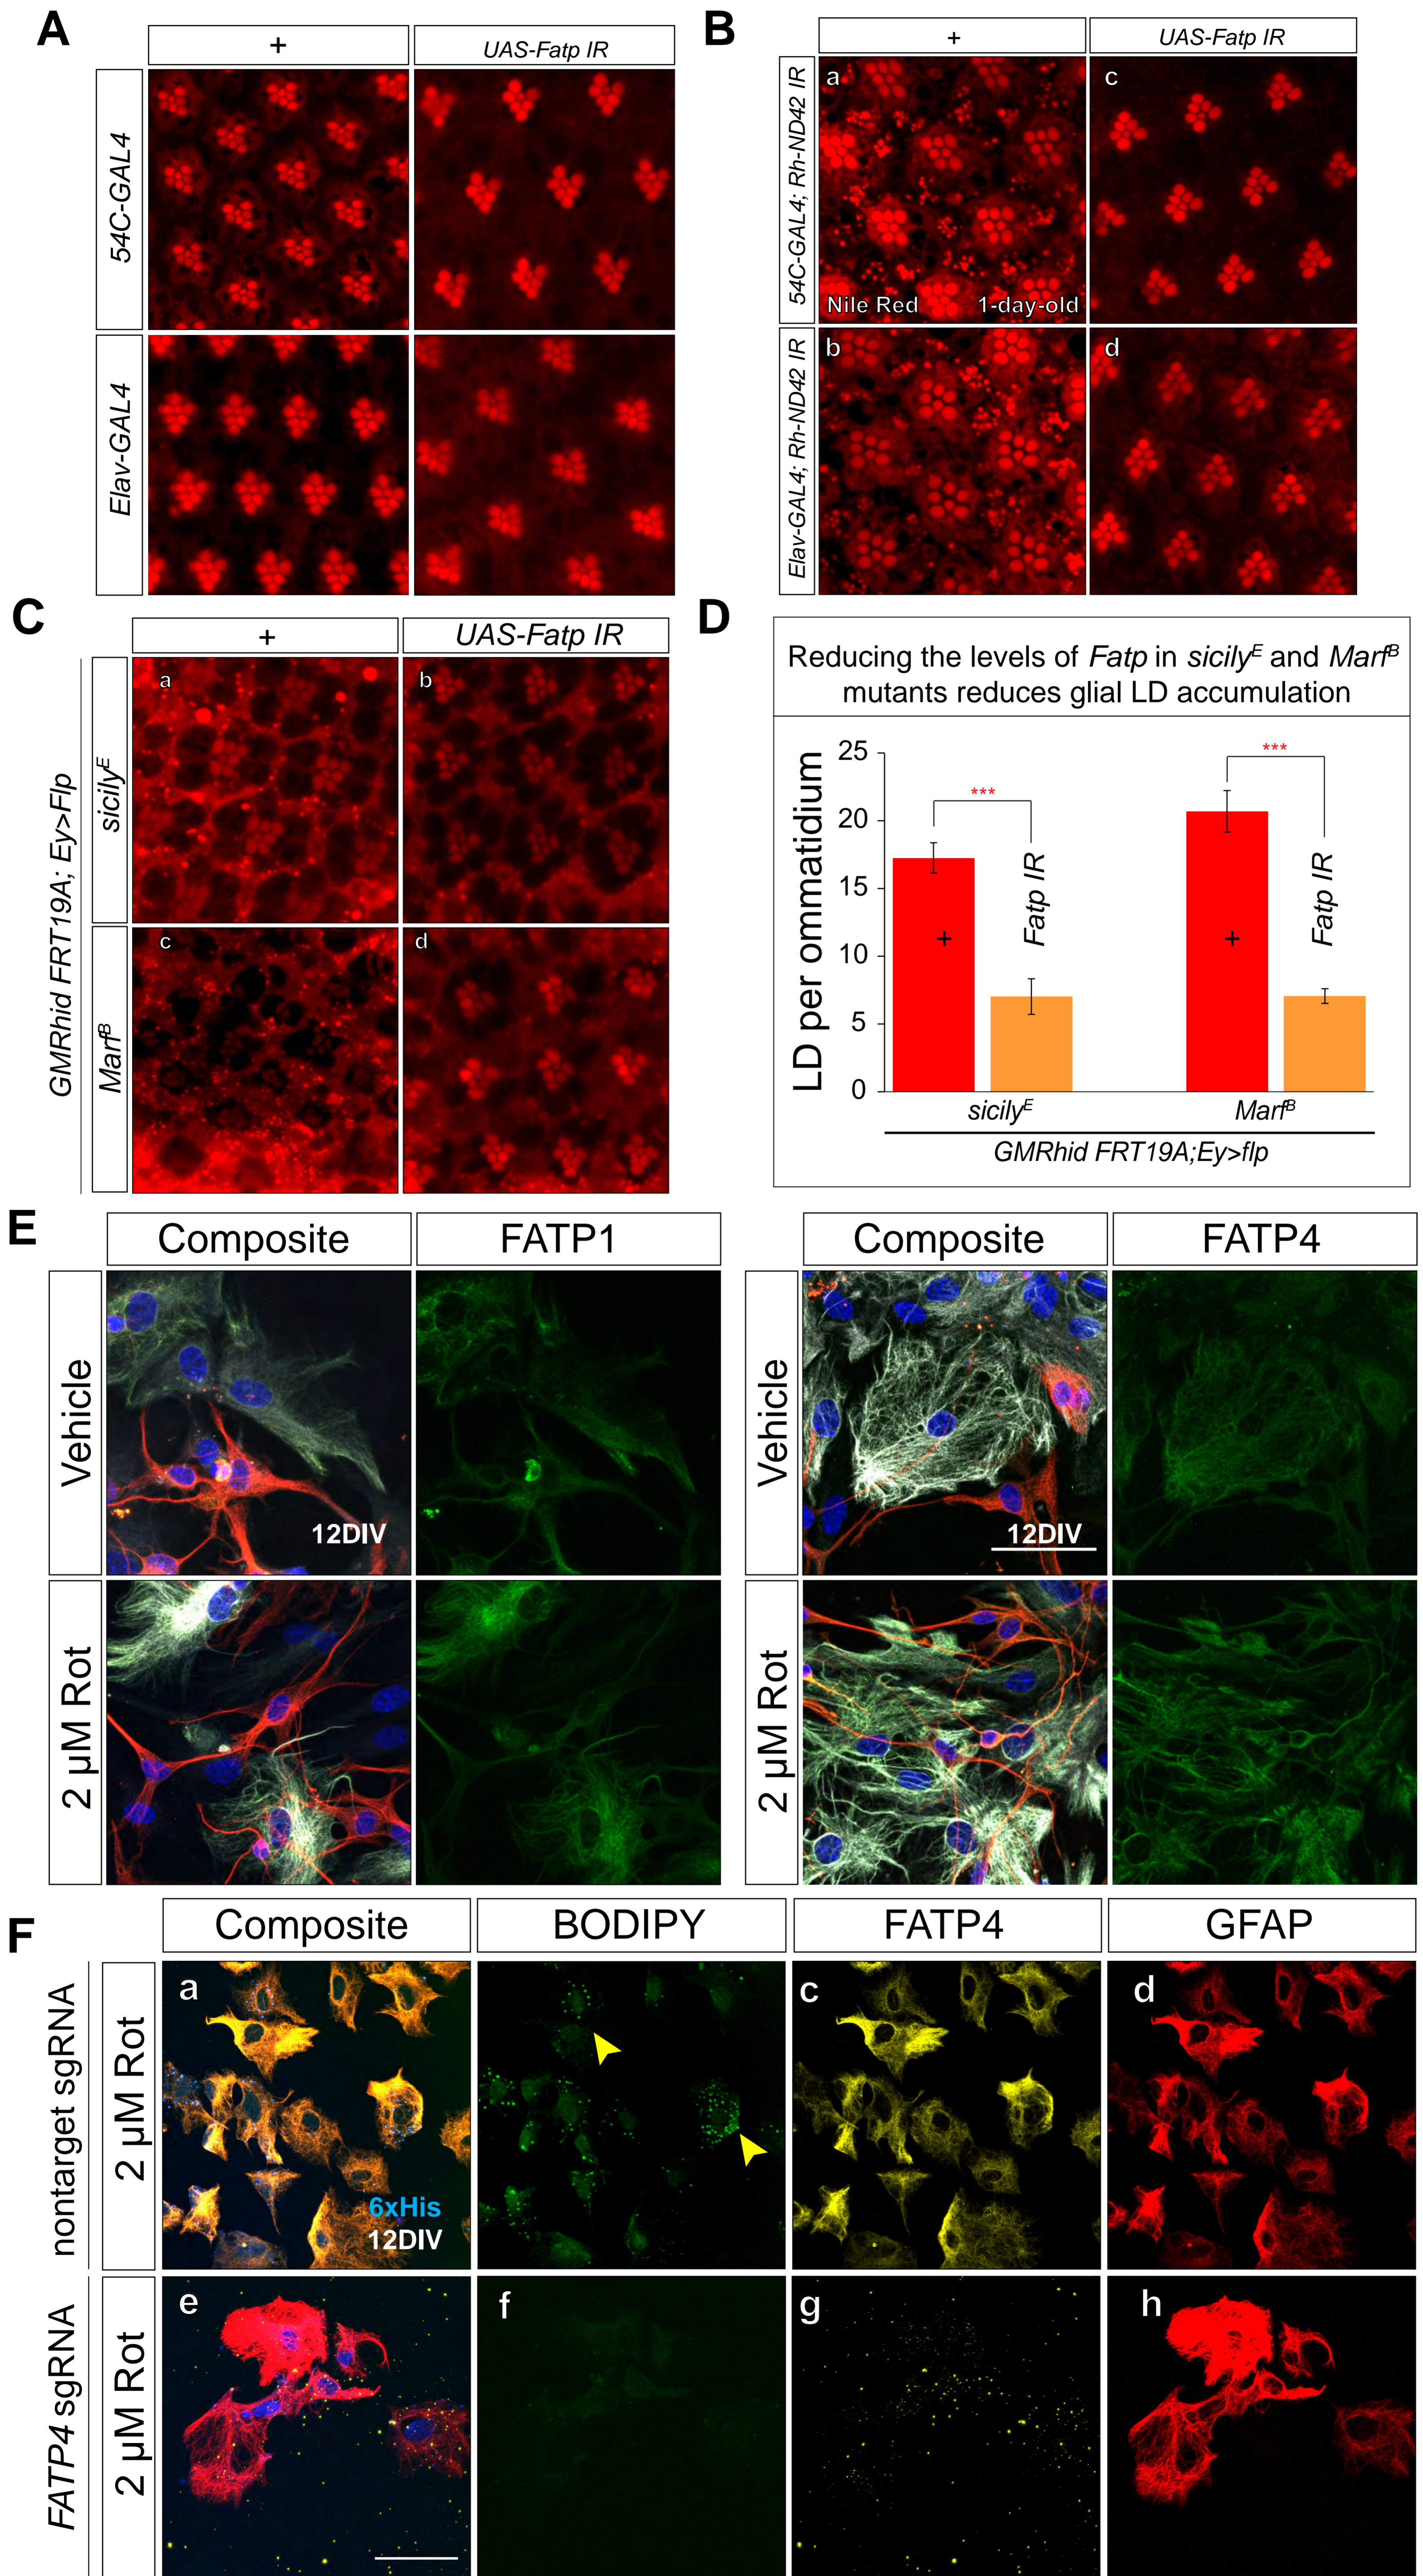

# Supplemental Figure 5

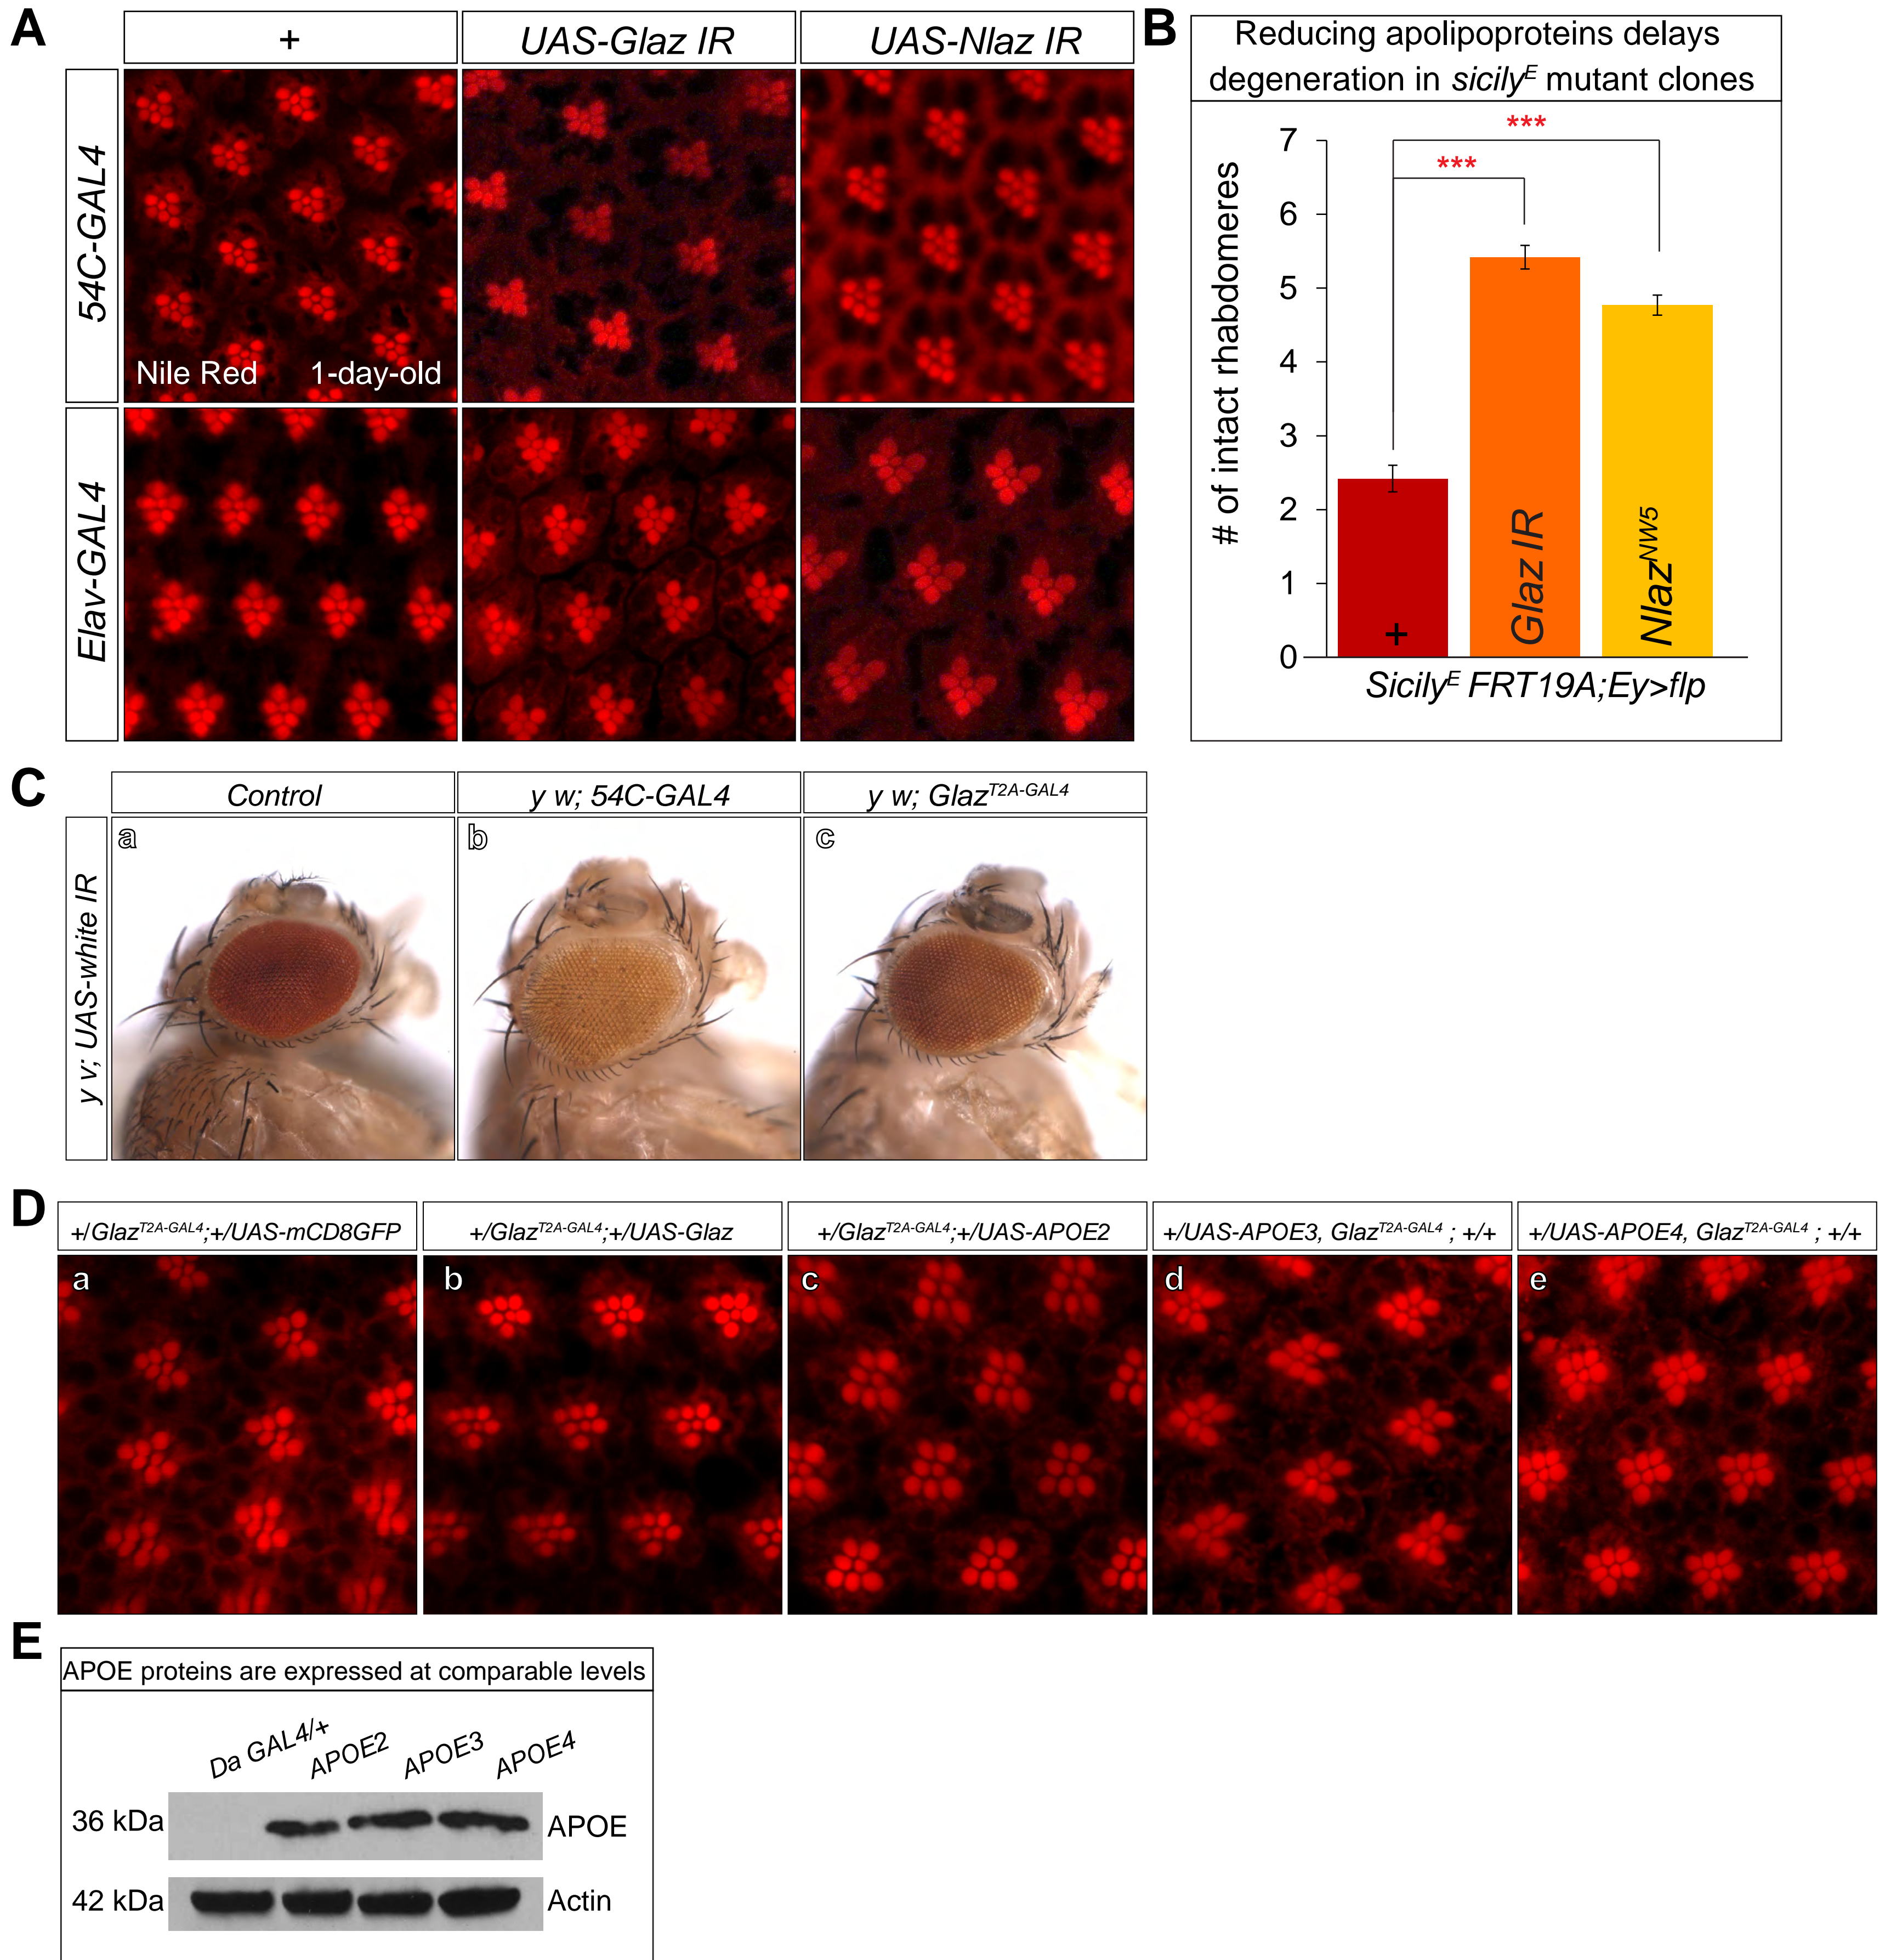



# Supplemental Figure 6

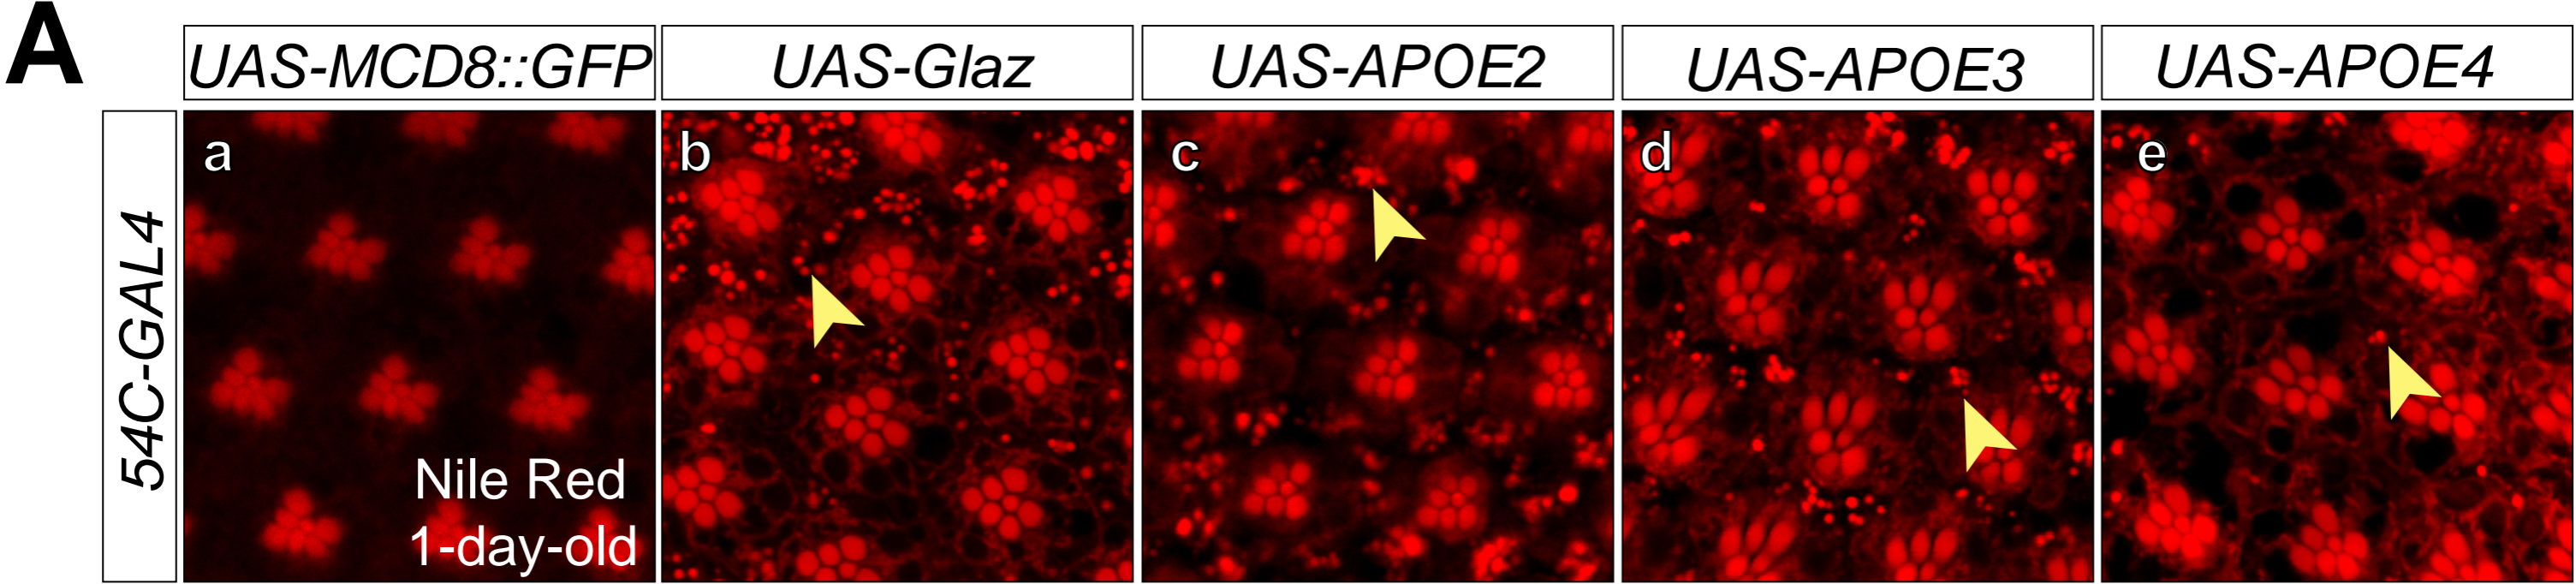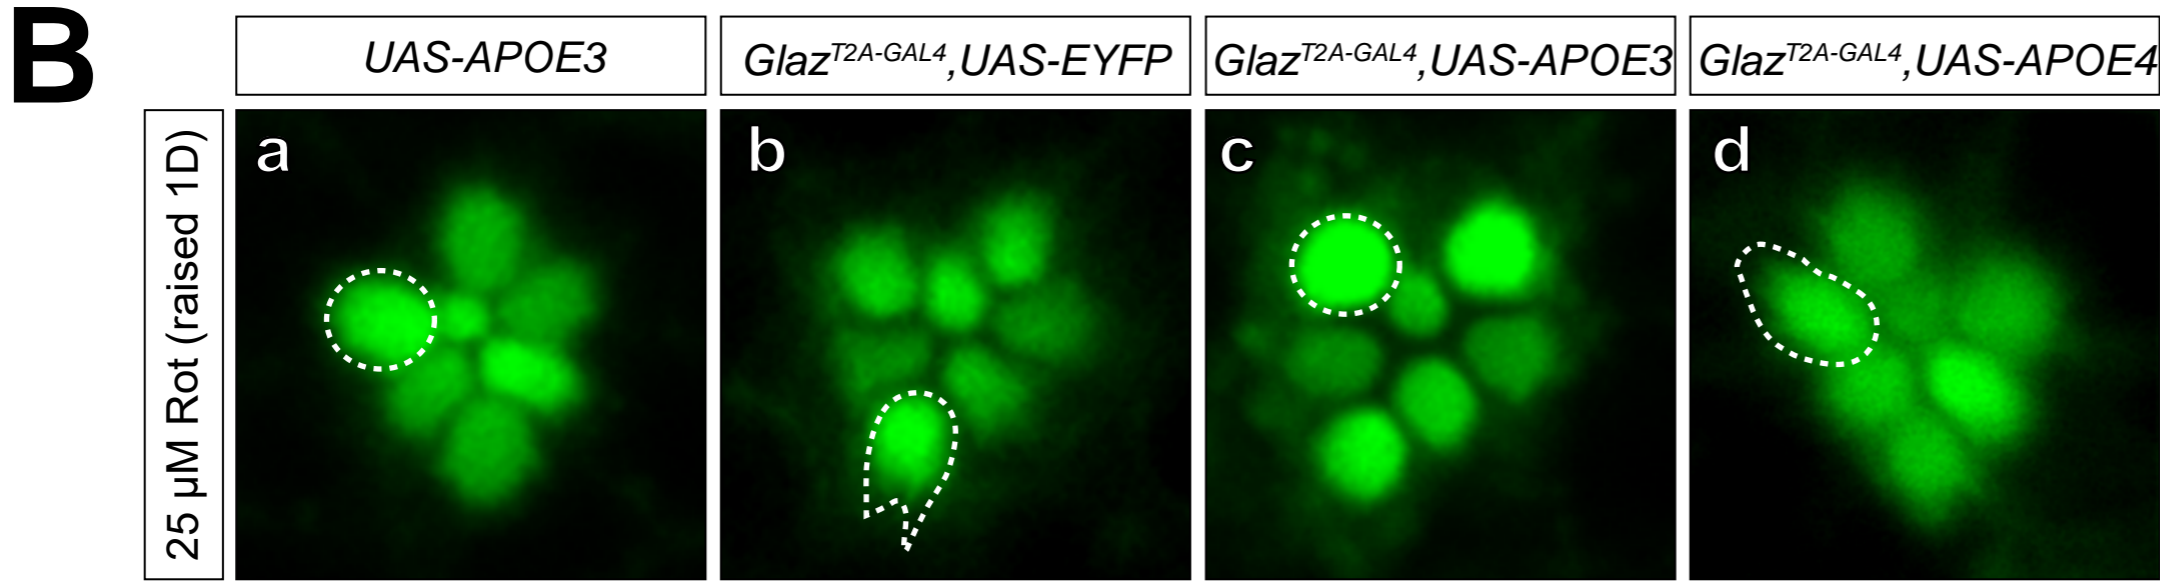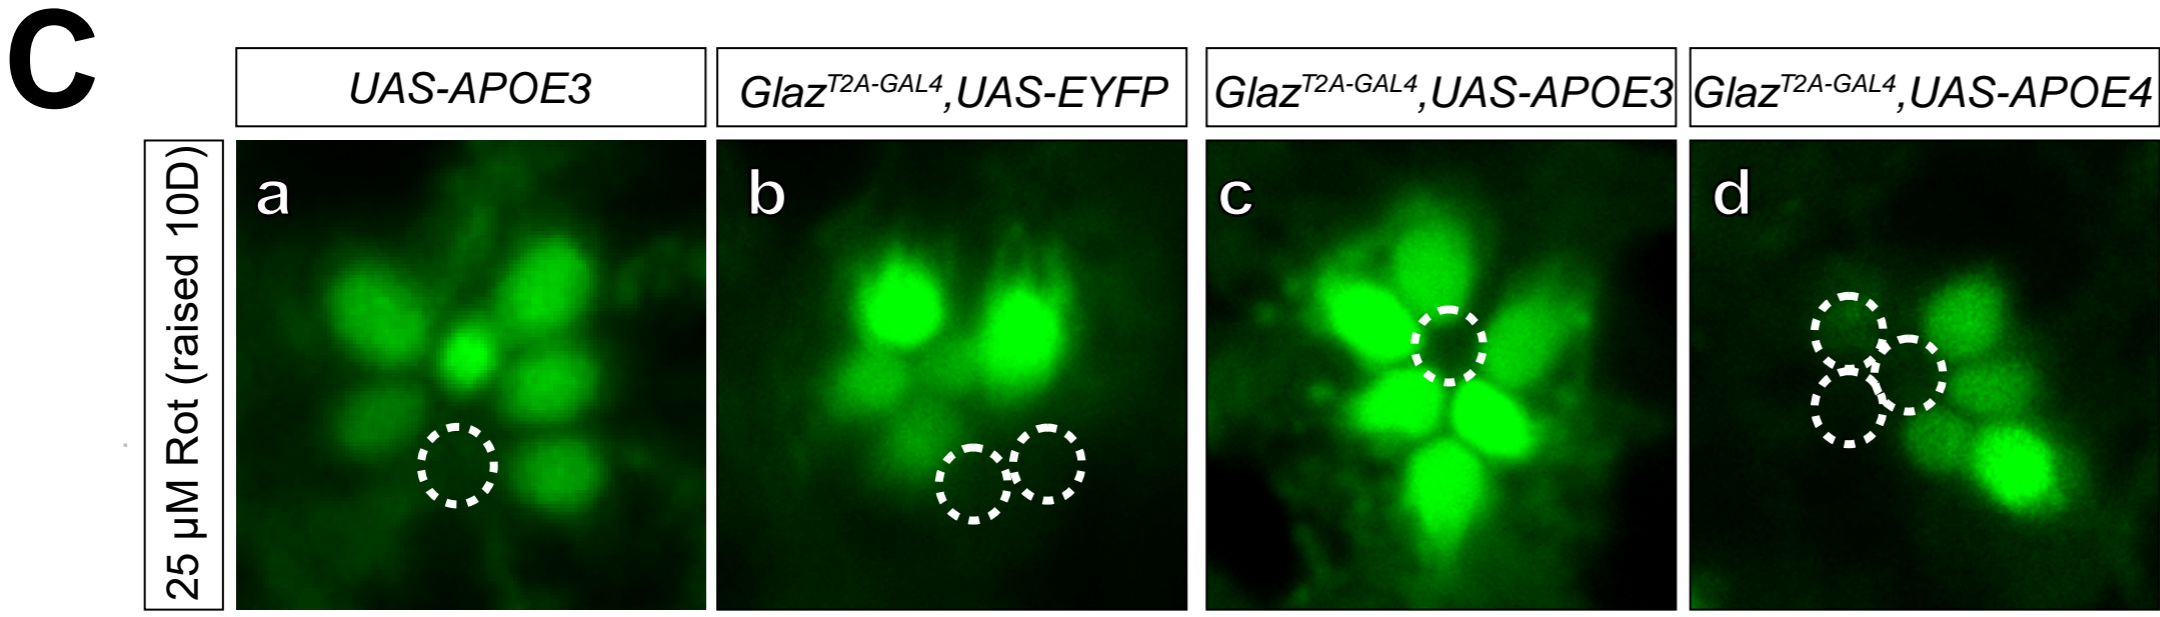

Supplement: NIHMS904216-supplement-1.pdf [file NIHMS904216-supplement-1.pdf]
